# Supplementary material
Source: publisher figshare collection journal article supplement (https://gsapubs.figshare.com/articles/dataset/_/22561255)
Supplement: Supplementary file 1 [file 5]

Deng, H., Kusky, T., Bozurt, E., Chen, C., Wang, L., Dong, Z., and Meng, J., 2023, Sr-Nd-Ca isotopic variations of Cenozoic calc-alkaline and alkaline volcanic rocks above a slab tear in Western Anatolia, Turkey: GSA Bulletin, <https://doi.org/10.1130/B36672.1>.

## Supplemental Material

**Supplemental Text S1.** Corresponding detailed descriptions of the analytical methods.

**Figure S1.** (a) SiO<sub>2</sub> versus Na<sub>2</sub>O + K<sub>2</sub>O classification diagram from Middlemost (1994); (b) Zr/TiO<sub>2</sub> versus Nb/Y classification from Winchester and Floyd (1977); (c) SiO<sub>2</sub> versus K<sub>2</sub>O diagram.

**Figure S2.** Variation diagrams of  $\delta^{44/40}\text{Ca}$  values versus LOI contents.

**Figure S3.** Variation diagrams of CaO, Al<sub>2</sub>O<sub>3</sub> and Eu/Eu\* versus SiO<sub>2</sub> for the Gördes dacites.

**Figure S4.** Variation diagrams of SiO<sub>2</sub>, Nb/Nb\* and La/Sm<sub>cn</sub> versus  $^{87}\text{Sr}/^{86}\text{Sr}_i$  for the Gördes dacites.

**Figure S5.** Variation diagrams of MgO, TFe<sub>2</sub>O<sub>3</sub>, CaO and CaO/Al<sub>2</sub>O<sub>3</sub> versus SiO<sub>2</sub> for the Kula basalts.

**Figure S6.** Variation diagrams of SiO<sub>2</sub>, La/Sm<sub>cn</sub>, Nb/Nb\* versus  $\epsilon\text{Nd}(t)$  and 1/Sr versus  $(^{87}\text{Sr}/^{86}\text{Sr})_i$  for the Kula basalts.

**Figure S7.** Variation diagrams of La/Sm versus Sm/Yb.

**Figure S8.** Selected cathodoluminescence images and U-Pb concordia diagrams of analyzed zircons of dacites.

**Table S1.** SHRIMP U-Pb data for zircons from Gördes dacites.

**Table S2.** Major and trace elemental compositions of dacites and basalts.

**Table S3.** Measured and recommended trace element concentrations (ppm) for AGV-2, BHVO-2, BCR-2 and RGM2.

**Table S4.** Whole rock Sr-Nd compositions and calculations of basalts and dacites.

**Table S5.** (a) Modeling calculation of Ca isotope fractionation during partial melting of spinel peridotite, (b) modeling calculation of Ca isotope fractionation during partial melting of garnet peridotite, and (c) modeling calcium isotope fractionation during partial melting of garnet pyroxenite.

# Supporting Material for

## **Sr-Nd-Ca isotopic variations of Cenozoic calc-alkaline and alkaline volcanic rocks above a slab tear in Western Anatolia, Turkey**

*Hao Deng<sup>1\*</sup>, Timothy Kusky<sup>1\*</sup>, Erdin Bozurt<sup>2</sup>, Chunfei Chen<sup>3,1</sup>, Lu Wang<sup>1</sup>, Ziyu Dong<sup>1</sup>, and Jiannan Meng*

*<sup>1</sup> State Key Laboratory of Geological Processes and Mineral Resources, Center for Global Tectonics, School of Earth Sciences, China University of Geosciences, Wuhan 430074, China*

*<sup>2</sup> Department of Geological Engineering, Middle East Technical University, TR-06800 Ankara, Turkey*

*<sup>3</sup> ARC Centre of Excellence for Core to Crust Fluid Systems, Dept. of Earth and Environmental Sciences, Macquarie University, North Ryde, New South Wales 2109, Australia*

### **Text S1. Corresponding detailed descriptions of the analytical methods**

#### ***1.1. Zircon U-Pb dating***

Zircon grains were extracted by heavy-liquid and magnetic methods, and were further purified by hand-picking under a binocular micro-scope. Photomicrographs and cathodoluminescence images were taken to examine their internal structures and to select the optimum positions for analysis. U-Pb zircon analyses were undertaken on a SHRIMP-II (sensitive high-resolution ion microprobe) instrument at the Beijing SHRIMP Centre (National Science and Technology Infrastructure), in the Institute of Geology at the Chinese Academy of Geological Sciences in Beijing (China). Detailed analytical procedures follow the method of [Williams \(1998\)](#). Data that are listed in

**Table S1**, were processed and assessed using the SQUID1.0 and ISOPLLOT software of Ludwig (2003).

### ***1.2. Major element analyses of whole rock***

Whole-rock samples were crushed in a corundum jaw crusher (to 60 meshes). About 60 g of each sample was powdered in an agate ring mill to less than 200 meshes. Major element analyses of whole rock were conducted on XRF (Primus II, Rigaku, Japan) at the Wuhan Sample solution Analytical Technology Co., Ltd., Wuhan, China. The detailed sample-digesting procedure was as follows: (1) Sample powder (200 mesh) were placed in an oven at 105 °C for drying of 12 hours; (2) ~1.0g dried sample was accurately weighted and placed in the ceramic crucible and then heated in a muffle furnace at 1000°C for 2 hours. After cooling to 400°C, this sample was placed in the drying vessel and weighted again in order to calculate the loss on ignition (LOI). (3) 0.6 g sample powder was mixed with 6.0 g cosolvent ( $\text{Li}_2\text{B}_4\text{O}_7$  :  $\text{LiBO}_2$  :  $\text{LiF}$  = 9:2:1) and 0.3 g oxidant ( $\text{NH}_4\text{NO}_3$ ) in a Pt crucible, which was placed in the furnace at 1150°C for 14 min. Then, this melting sample was quenched with air for 1 min to produce flat discs on the fire brick for the XRF analyses.

### ***1.3. Trace element analyses of whole rock***

Trace element analysis of whole rock were conducted on Agilent 7700e ICP-MS at the Wuhan Sample Solution Analytical Technology Co., Ltd., Wuhan, China. The detailed sample-digesting procedure was as follows: (1) Sample powder (200 mesh) were placed in an oven at 105 °C for drying of 12 hours; (2) 50 mg sample powder was accurately weighed and placed in a Teflon bomb; (3) 1 ml  $\text{HNO}_3$  and 1 ml HF were slowly added into the Teflon bomb; (4) Teflon bomb was putted in a stainless steel pressure jacket and heated to 190 °C in an oven for >24 hours; (5) After cooling, the Teflon bomb was opened and placed on a hotplate at 140 °C and evaporated to incipient dryness, and then 1 ml  $\text{HNO}_3$  was added and evaporated to dryness again; (6) 1 ml of  $\text{HNO}_3$ , 1 ml of MQ water and 1 ml internal standard solution of 1ppm In were added, and the Teflon bomb was resealed and placed in the oven at 190 °C for >12 hours; (7)

The final solution was transferred to a polyethylene bottle and diluted to 100 g by the addition of 2% HNO<sub>3</sub>.

#### ***1.4. Scheme for Sr isotope ratio analyses using MC-ICP-MS***

All chemical preparations were performed on class 100 work benches within a class 1000 over-pressured clean laboratory. **Sample digestion:** (1) Sample powder (200 mesh) were placed in an oven at 105 °C for drying of 12 hours; (2) 50-200 mg sample powder was accurately weighed and placed in a Teflon bomb; (3) 1-3 ml HNO<sub>3</sub> and 1-3 ml HF were added into the Teflon bomb; (4) Teflon bomb was putted in a stainless steel pressure jacket and heated to 190 °C in an oven for >24 hours; (5) After cooling, the Teflon bomb was opened and placed on a hotplate at 140 °C and evaporated to incipient dryness, and then 1 ml HNO<sub>3</sub> was added and evaporated to dryness again; (6) The sample was dissolved in 1.5 mL of 2.5 M HCl. **Column chemistry:** After centrifugation, the supernatant solution was loaded into an ion-exchange column packed with AG50W resin. After complete draining of the sample solution, columns were rinsed with 2.5 M HCl to remove undesirable matrix elements. Finally, the Sr fraction was eluted using 2.5 M HCl and gently evaporated to dryness prior to mass-spectrometric measurement. The residue was rinsed with 10 mL of 4.0 M HCl and then the REE fraction was eluted using 10 ml of 4.0 M HCl. The REE solution was used to separate the Nd fraction by the Nd-column method.

For the Rb-rich sample, after the separation of the common ion-exchange column, the Sr fraction was separated again by the Sr-specific resin. The solution was first converted to the HNO<sub>3</sub> media (3 M HNO<sub>3</sub>). Then the solution was loaded into the Sr-specific resin and pre-conditioned with 6 M HCl and 3 M HNO<sub>3</sub>. After complete draining of the sample solution, columns were rinsed with 3 M HNO<sub>3</sub> to remove undesirable matrix elements. Finally, Sr was eluted using MQ H<sub>2</sub>O and gently evaporated to dryness prior to mass-spectrometric measurement.

Sr isotope analyses were performed on a Neptune Plus MC-ICP-MS (Thermo Fisher Scientific, Dreieich, Germany) at the Wuhan Sample Solution Analytical Technology Co., Ltd, Hubei, China. The Neptune Plus, a double focusing MC-ICP-

MS, was equipped with seven fixed electron multiplier ICs, and nine Faraday cups fitted with  $10^{11} \Omega$  resistors. The faraday collector configuration of the mass system was composed of an array from L4 to H3 to monitor  $^{83}\text{Kr}^+$ ,  $^{167}\text{Er}^{++}$ ,  $^{84}\text{Sr}^+$ ,  $^{85}\text{Rb}^+$ ,  $^{86}\text{Sr}^+$ ,  $^{173}\text{Yb}^{++}$ ,  $^{87}\text{Sr}^+$ ,  $^{88}\text{Sr}^+$ . The large dry interface pump ( $120 \text{ m}^3 \text{ hr}^{-1}$  pumping speed) and newly designed X skimmer cone and Jet sample cone were used to increase the instrumental sensitivity. Sr single element solution from Alfa (Alfa Aesar, Karlsruhe, Germany) was used to optimize instrument operating parameters. An aliquot of the international standard solution of  $200 \mu\text{g L}^{-1}$  NIST SRM 987 was used regularly for evaluating the reproducibility and accuracy of the instrument. Typically, the signal intensities of  $^{88}\text{Sr}$  in NIST SRM 987 were  $> \sim 4.0 \text{ V}$ . The Sr isotopic data were acquired in the static mode at low resolution. The routine data acquisition consisted of ten blocks of 10 cycles ( $4.194 \text{ s}$  integration time per cycle). The total time of one measurement lasted about 7 minutes.

The exponential law, which initially was developed for TIMS measurement (Russell et al. 1978) and remains the most widely accepted and utilized with MC-ICP-MS, was used to assess the instrumental mass discrimination in this study. Mass discrimination correction was carried out via internal normalization to a  $^{88}\text{Sr}/^{86}\text{Sr}$  ratio of 8.375209 (Lin et al. 2016). The interference elements Ca, Rb, Er, Yb have been completely separated by the exchange resin process. The remaining interferences of  $^{83}\text{Kr}^+$ ,  $^{85}\text{Rb}^+$ ,  $^{167}\text{Er}^{++}$ ,  $^{173}\text{Yb}^{++}$  were corrected based on the method described by Lin et al. (2016). One international NIST SRM 987 standard was measured every ten samples analyzed. Analyses of the NIST SRM 987 standard solution yielded  $^{87}\text{Sr}/^{86}\text{Sr}$  ratio of  $0.710244 \pm 22$  (2SD,  $n=32$ ), which is identical within error to their published values ( $0.710241 \pm 12$ , Thirlwall, 1991). In addition, the USGS reference materials BCR-2 (basalt) and RGM-2 (rhyolite) yielded results of  $0.705034 \pm 14$  (2SD,  $n=4$ ) and  $0.704192 \pm 10$  (2SD,  $n=4$ ) for  $^{87}\text{Sr}/^{86}\text{Sr}$ , respectively, which is identical within error to their published values (Li et al. 2012).

### ***1.5. Scheme for Nd isotope ratio analyses using MC-ICP-MS***

All chemical preparations were performed on class 100 work benches within a class 1000 over-pressured clean laboratory. Column chemistry: The REE solution from the Sr-column method was evaporated to incipient dryness, and taken up with 0.18 M HCl. The converted REE solution was loaded into an ion-exchange column packed with LN resin. After complete draining of the sample solution, columns were rinsed with 0.18 M HCl to remove undesirable matrix elements. Finally, the Sr fraction was eluted using 0.3 M HCl and gently evaporated to dryness prior to mass-spectrometric measurement.

Nd isotope analyses were performed on a Neptune Plus MC-ICP-MS (Thermo Fisher Scientific, Dreieich, Germany) at the Wuhan Sample Solution Analytical Technology Co., Ltd, Hubei, China. The Neptune Plus, a double focusing MC-ICP-MS, was equipped with seven fixed electron multiplier ICs, and nine Faraday cups fitted with  $10^{11} \Omega$  resistors. The faraday collector configuration of the mass system was composed of an array from L4 to H4 to monitor  $^{142}\text{Nd}^+$ ,  $^{143}\text{Nd}^+$ ,  $^{144}\text{Nd}^+$ ,  $^{145}\text{Nd}^+$ ,  $^{146}\text{Nd}^+$ ,  $^{147}\text{Sm}^+$ ,  $^{148}\text{Nd}^+$ ,  $^{149}\text{Sm}^+$ ,  $^{150}\text{Nd}^+$ . The large dry interface pump (120  $\text{m}^3 \text{ hr}^{-1}$  pumping speed) and newly designed X skimmer cone and Jet sample cone were used to increase the instrumental sensitivity. Nd single element solution from Alfa (Alfa Aesar, Karlsruhe, Germany) was used to optimize instrument operating parameters. An aliquot of the international standard solution of 200  $\mu\text{g L}^{-1}$  JNdi-1 was used regularly for evaluating the reproducibility and accuracy of the instrument. Typically, the signal intensities of  $^{144}\text{Nd}^+$  in JNdi-1 were  $> \sim 2.5$  V. The Nd isotopic data were acquired in the static mode at low resolution. The routine data acquisition consisted of ten blocks of 10 cycles (4.194 s integration time per cycle). The total time of one measurement lasted about 7 min.

The exponential law, which initially was developed for TIMS measurement (Russell et al. 1978) and remains the most widely accepted and utilized with MC-ICP-MS, was used to assess the instrumental mass discrimination in this study. Mass discrimination correction was carried out via internal normalization to a  $^{146}\text{Nd} / ^{144}\text{Nd}$  ratio of 0.7219 (Lin et al. 2016). The interference elements Sm have been completely separated by the exchange resin process. The remaining interferences of  $^{144}\text{Sm}^+$  were

corrected based on the method described by Lin et al. (2016). One JNdi-1 standard was measured every ten samples analyzed. Analyses of the JNdi-1 standard yielded  $^{143}\text{Nd}/^{144}\text{Nd}$  ratio of  $0.512118 \pm 15$  (2SD,  $n=31$ ), which is identical within error to their published values ( $0.512115 \pm 07$ , Tanaka et al., 2000). In addition, the USGS reference materials BCR-2 (basalt) and RGM-2 (rhyolite) yielded results of  $0.512644 \pm 15$  (2SD,  $n=6$ ) and  $0.512810 \pm 15$  (2SD,  $n=4$ ) for  $^{143}\text{Nd}/^{144}\text{Nd}$ , respectively, which is identical within error to their published values (Li et al. 2012).

Collectively, the major and trace elemental data of the analyzed samples are given in Table S2. The results of standard analyses and recommended values are given in Table S3. The analytical data of Rb-Sr and Sm-Nd isotopes are listed in Table S4.

### ***1.6. Calcium isotope analyses***

12 samples of early Miocene volcanic rocks from the Gördes basin and 10 samples of Quaternary Kula basalts were selected for calcium isotopes analyses. All chemical preparations were performed on class 100 work benches within a class 1000 over-pressured clean laboratory. **Sample digestion:** (1) Sample powder (200 mesh) were placed in an oven at  $105\text{ }^{\circ}\text{C}$  for drying of 12 hours; (2) 10 - 50 mg sample powder was accurately weighed and placed in a Teflon bomb; (3) 1 ml  $\text{HNO}_3$  and 1 ml HF were added into the Teflon bomb; (4) Teflon bomb was putted in a stainless steel pressure jacket and heated to  $190\text{ }^{\circ}\text{C}$  in an oven for at least 24 hours; (5) After cooling, the Teflon bomb was opened and placed on a hotplate at  $140\text{ }^{\circ}\text{C}$  and evaporated to incipient dryness, and then 1 ml  $\text{HNO}_3$  was added and evaporated to dryness again; (6) The sample was dissolved in 10 mL of 4 M  $\text{HNO}_3$ . An aliquot sample solution containing  $40\text{ }\mu\text{g}$  Ca was loaded onto the pre-cleaned PFA column which filled with  $250\text{ }\mu\text{l}$  DGA resin. All the sample matrices were removed by 4 mol L<sup>-1</sup>  $\text{HNO}_3$  while quantitative recovery ( $>99\%$ ) of Ca was achieved by the elution of  $\text{MQ-H}_2\text{O}$ . The collected Ca fractions were evaporated to dryness and re-dissolved in 2 %  $\text{HNO}_3$  to obtain 10 ppm Ca solution prior to MC-ICP-MS analysis. The total procedural blank was no more than 20 ng which is negligible compared to the digestions.

Calcium isotopes analyses were performed on a Neptune Plus MC-ICP-MS (Thermo Fisher Scientific, Dreieich, Germany) at the WSSATC. A “wet” plasma, using a quartz dual cyclonic-spray chamber and an Savillex 50  $\mu\text{L min}^{-1}$  PFA MicroFlow Teflon nebulizer (Elemental Scientific Inc., U.S.A.), was utilized to measure Ca isotopes. The large dry interface pump (120  $\text{m}^3 \text{hr}^{-1}$  pumping speed) and newly designed X skimmer cone and Jet sample cone were used to increase the instrumental sensitivity. Typically, the signal intensities of  $^{44}\text{Ca}^+$  in 10 ppm sample solution were  $> 5 \text{ V}$ . Cross-contamination between samples was eliminated by washing the sample-introduction system with 5%  $\text{HNO}_3$  for 2-3 min between each measurement until the  $^{44}\text{Ca}$  signal is less than 1 mV. Medium resolution mode was used to resolve polyatomic interference, such as  $^{40}\text{Ar}^1\text{H}^{2+}$  and  $^{14}\text{N}^{3+}$ . The instrumental drift was corrected by the standard-sample bracketing technique. All the Ca isotopic compositions were reported relative to a reference standard by using  $\delta$ -notation:  $\delta^{44/42}\text{Ca}_{\text{ref}} = [^{44}\text{Ca}/^{42}\text{Ca}_{\text{sample}}/^{44}\text{Ca}/^{42}\text{Ca}_{\text{ref}} - 1] \times 1000$ . All Ca isotopic values ( $\delta^{44/42}\text{Ca}$ ) in this study are then converted to  $\delta^{44/40}\text{Ca}$  using a factor of 2.048 calculated by the mass dependent fractionation law (Heuser et al., 2016). An in-house Alfa Ca standard solution (Lot: 9192737) was used as bracketing reference standard. However, in order to achieve better comparability of published Ca isotope data, all Ca isotope results were reported relative to commonly used reference standard NIST SRM 915a by adding a conversion factor 0.58 (the  $\delta^{44/42}\text{Ca}_{\text{SRM915a}}$  value of Alfa Ca). Each sample solution has been measured multiple times ( $\geq 3$ ), and the two times standard deviation is reported as the analytical uncertainty.

The long-term ( $>3$  months) average  $\delta^{44/42}\text{Ca}_{\text{SRM915a}}$  of NIST 915a is  $0.001 \pm 0.058\text{‰}$  (2SD,  $n = 155$ ) indicated that the reproducibility of our instrument is better than  $0.06\text{‰}$  (2SD). Three reference materials (BHVO-2, BCR-2 and seawater) and two duplicate samples were processed as unknowns to assess accuracy and reproducibility. The analyzed  $\delta^{44/42}\text{Ca}_{\text{SRM915a}}$  values of BHVO-2, BCR-2 and seawater are  $0.36 \pm 0.02\text{‰}$  (2SD,  $n = 3$ ),  $0.39 \pm 0.03\text{‰}$  (2 SD,  $n = 3$ ) and  $0.90 \pm 0.04\text{‰}$  (2SD,  $n = 3$ ), respectively. These results are consistent with previous studies within analytical uncertainty, conforming the accuracy of our analytical method for Ca isotopes in geological samples (Amini et al., 2009; Feng et al., 2018; Heuser and Eisenhauer, 2008;

[Kang et al., 2017](#); [Li et al., 2018](#)). Results of calcium compositions of all samples and standards are listed in [Table 1](#).

## ***2. Descriptions of zircon U-Pb geochronology***

All zircons derived from the dacites are characterized by weak oscillatory zoning and low luminescence in CL images, consistent with their igneous origin. Thirteen zircons from sample DH822 have high contents of Th (125-390 ppm) and U (597-1499 ppm) with high Th/U (0.17-0.31) ratios. They yield a weighted mean age of  $18.19 \pm 0.16$  Ma (MSWD = 1.09) ([Fig. S8](#)). Twelve zircons from sample DH922 have high contents of Th (102-576 ppm) and U (479-2347 ppm) with high Th/U (0.17-0.36) ratios. They yield a weighted mean age of  $18.20 \pm 0.18$  Ma (MSWD = 0.8) ([Fig. S8](#)).

## ***3. Selected model parameters and partition coefficient values for partial melting modelling***

The CaO content of spinel peridotite is 3.54 wt.% ([McDonough and Sun, 1995](#)). Initial mineral modal abundance and melting mode of spinel peridotite were adopted from [Niu \(1997\)](#), whereas those of garnet peridotite adopted from [Davis et al. \(2011\)](#) and [Walter \(1998\)](#), respectively. Initial CaO content of minerals of garnet peridotite was taken from [Davis et al. \(2011\)](#). Partition coefficient values (D) for Ca between minerals and basaltic melt of spinel peridotite are adopted from [Adam and Green \(2006\)](#). Partition coefficients for garnet peridotite were calculated from [Davis et al. \(2011\)](#). The initial CaO content and modal abundance of the garnet pyroxenite for modeling calculation are from [Gréau et al. \(2011\)](#). Partition coefficients for garnet pyroxenite are from [Pertermann et al. \(2004\)](#). Detailed calculations can be seen in [Table S5](#).

## **References**

- Adam, J., Green, T., 2006. Trace element partitioning between mica-and amphibole-bearing garnet lherzolite and hydrous basanitic melt: 1. Experimental results and the investigation of controls on partitioning behaviour. *Contributions to Mineralogy and Petrology* 152, 1-17.
- Amini, M., Eisenhauer, A., Böhm, F., Holmden, C., Kreissig, K., Hauff, F., Jochum, K.P., 2009. Calcium isotopes ( $\delta^{44/40}\text{Ca}$ ) in MPI-DING reference glasses, USGS rock powders and various rocks: Evidence for Ca isotope fractionation in terrestrial silicates. *Geostandards and Geoanalytical Research* 33, 231-247.
- Aldanmaz, E., Pearce, J.A., Thirlwall, M., Mitchell, J., 2000. Petrogenetic evolution of late Cenozoic, post-collision volcanism in western Anatolia, Turkey. *Journal of volcanology and geothermal research*, 102(1-2): 67-95.
- Davis, F., Hirschmann, M., Humayun, M., 2011. The composition of the incipient partial melt of garnet peridotite at 3 GPa and the origin of OIB. *Earth and Planetary Science Letters* 308, 380-390.
- Feng, L., Zhou, L., Yang, L., Zhang, W., Wang, Q., Tong, S., Hu, Z., 2018. A rapid and simple single-stage method for Ca separation from geological and biological samples for isotopic analysis by MC-ICP-MS. *Journal of Analytical Atomic Spectrometry* 33, 413-421.
- Gréau, Y., Huang, J.-X., Griffin, W.L., Renac, C., Alard, O., O'Reilly, S.Y., 2011. Type I eclogites from Roberts Victor kimberlites: Products of extensive mantle metasomatism. *Geochimica et Cosmochimica Acta* 75, 6927-6954.
- Heuser, A., Eisenhauer, A., 2008. The calcium isotope composition ( $\delta^{44/40}\text{Ca}$ ) of NIST SRM 915b and NIST SRM 1486. *Geostandards and Geoanalytical Research* 32, 27-32.
- Li, C.F., Li, X.H., Li, Q.L., Guo, J.H. and Yang, Y.H., 2012. Rapid and precise determination of Sr and Nd isotopic ratios in geological samples from the same filament loading by thermal ionization mass spectrometry employing a single-step separation scheme. *Analytica Chimica Acta*, 727 (10), 54–60.

- Li, C., Ripley, E.M., 2010. The relative effects of composition and temperature on olivine-liquid Ni partitioning: Statistical deconvolution and implications for petrologic modeling. *Chemical Geology* 275, 99-104.
- Li, M., Lei, Y., Feng, L., Wang, Z., Belshaw, N.S., Hu, Z., Liu, Y., Zhou, L., Chen, H., Chai, X., 2018. High-precision Ca isotopic measurement using a large geometry high resolution MC-ICP-MS with a dummy bucket. *Journal of Analytical Atomic Spectrometry* 33, 1707-1719.
- Lin, J., Liu Y.S., Yang Y.H. and Hu Z.C., 2016, Calibration and correction of LA-ICP-MS and LA-MC-ICP-MS analyses for element contents and isotopic ratios. *Solid Earth Sciences*, 1, 5–27.
- McDonough, W.F., Sun, S.-S., 1995. The composition of the Earth. *Chemical Geology* 120, 223-253.
- Niu, Y., 1997. Mantle melting and melt extraction processes beneath ocean ridges: evidence from abyssal peridotites. *Journal of Petrology* 38, 1047-1074.
- Pertermann, M., Hirschmann, M.M., Hametner, K., Günther, D., Schmidt, M.W., 2004. Experimental determination of trace element partitioning between garnet and silica-rich liquid during anhydrous partial melting of MORB-like eclogite. *Geochemistry, Geophysics, Geosystems* 5 (5).
- Russell, W.A., Papanastassiou, D.A. and Tombrello, T.A., 1978. Ca isotope fractionation on the earth and other solar system materials. *Geochim. Cosmochim. Acta*, 42 (8), 1075–1090.
- Takahashi, E., 1985. Origin of basaltic magma-Implications from peridotite melting experiments and an olivine fractionation model. *Bull. Volcanol. Soc. Japan* 30, S17-S40.
- Tanaka, T., Togashi, S., Kamioka, H., Amakawa, H., Kagami, H., Hamamoto, T., et al., 2000. Jndi-1: a neodymium isotopic reference in consistency with lajolla neodymium. *Chemical Geology*, 168 (168), 279-281.
- Thirlwall, M.F., 1991. Long-term reproducibility of multicollector sr and nd isotope ratio analysis. *Chemical Geology*, 94 (2), 85–104.

- Walter, M.J., 1998. Melting of garnet peridotite and the origin of komatiite and depleted lithosphere. *Journal of Petrology* 39, 29-60.
- Weis, D., Kieffer, B., Maerschalk, C., Barling, J., Jong, J. D., Williams, G. A., et al., 2006. High-precision isotopic characterization of USGS reference materials by TIMS and MC-ICP-MS. *Geochemistry Geophysics Geosystems*, 7 (8), 139-149.

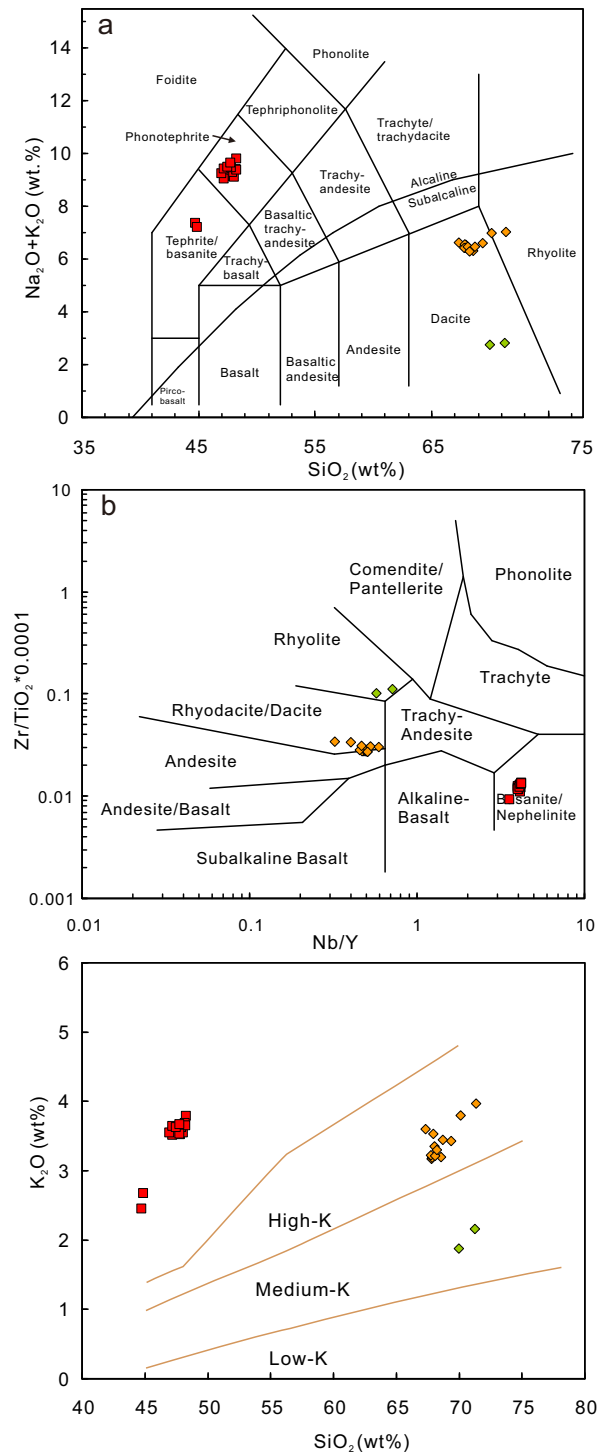

Fig. S1. (a)  $\text{SiO}_2$  versus  $\text{Na}_2\text{O} + \text{K}_2\text{O}$  classification diagram from Middlemost (1994); (b)  $\text{Zr}/\text{TiO}_2$  versus  $\text{Nb}/\text{Y}$  classification from Winchester and Floyd (1977); (c)  $\text{SiO}_2$  versus  $\text{K}_2\text{O}$  diagram.

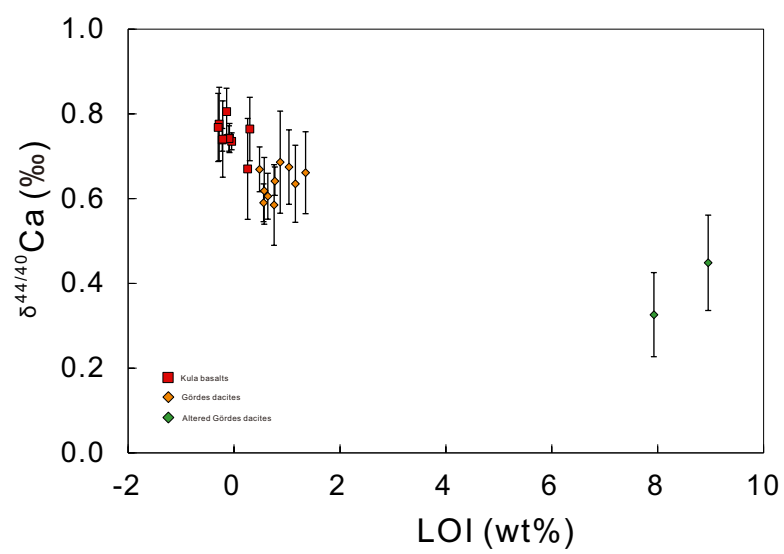

Fig. S2. Variation diagrams of  $\delta^{44/40}\text{Ca}$  values versus LOI contents.

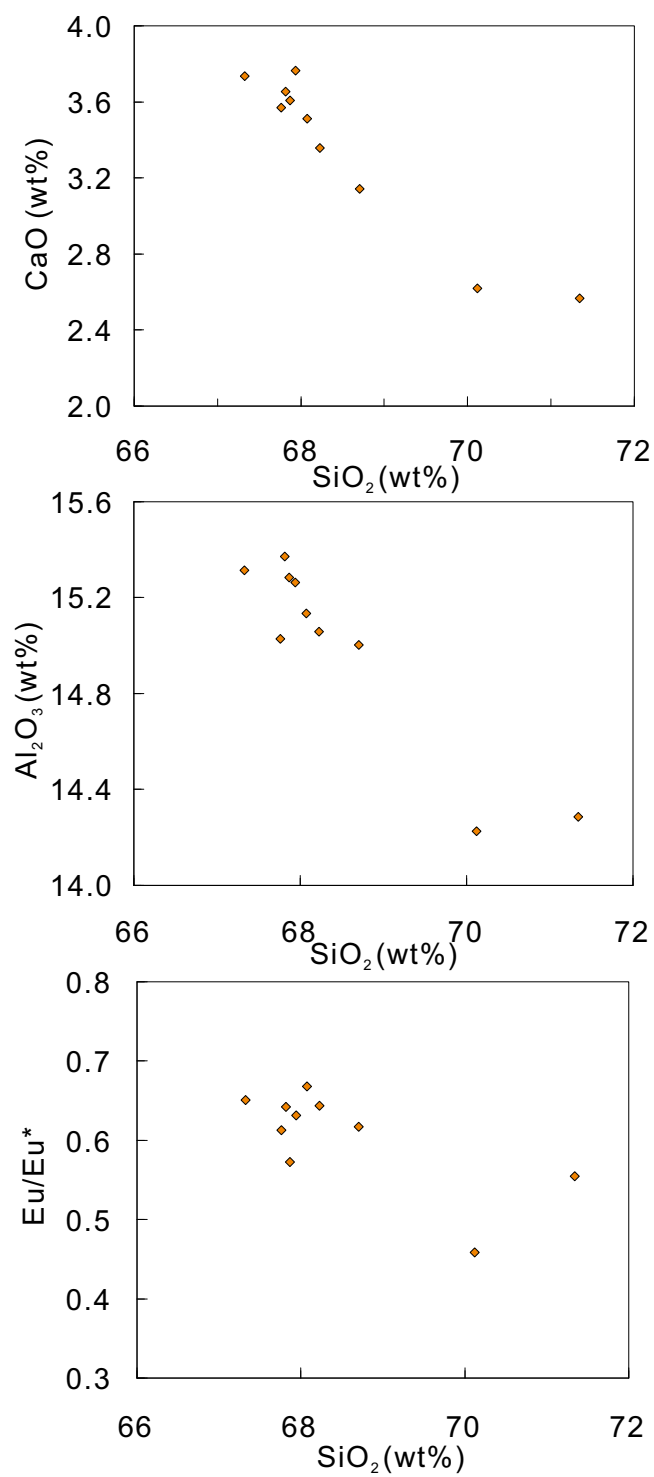

Fig. S3. Variation diagrams of  $\text{CaO}$ ,  $\text{Al}_2\text{O}_3$  and  $\text{Eu}/\text{Eu}^*$  versus  $\text{SiO}_2$  for the Gördes dacites.

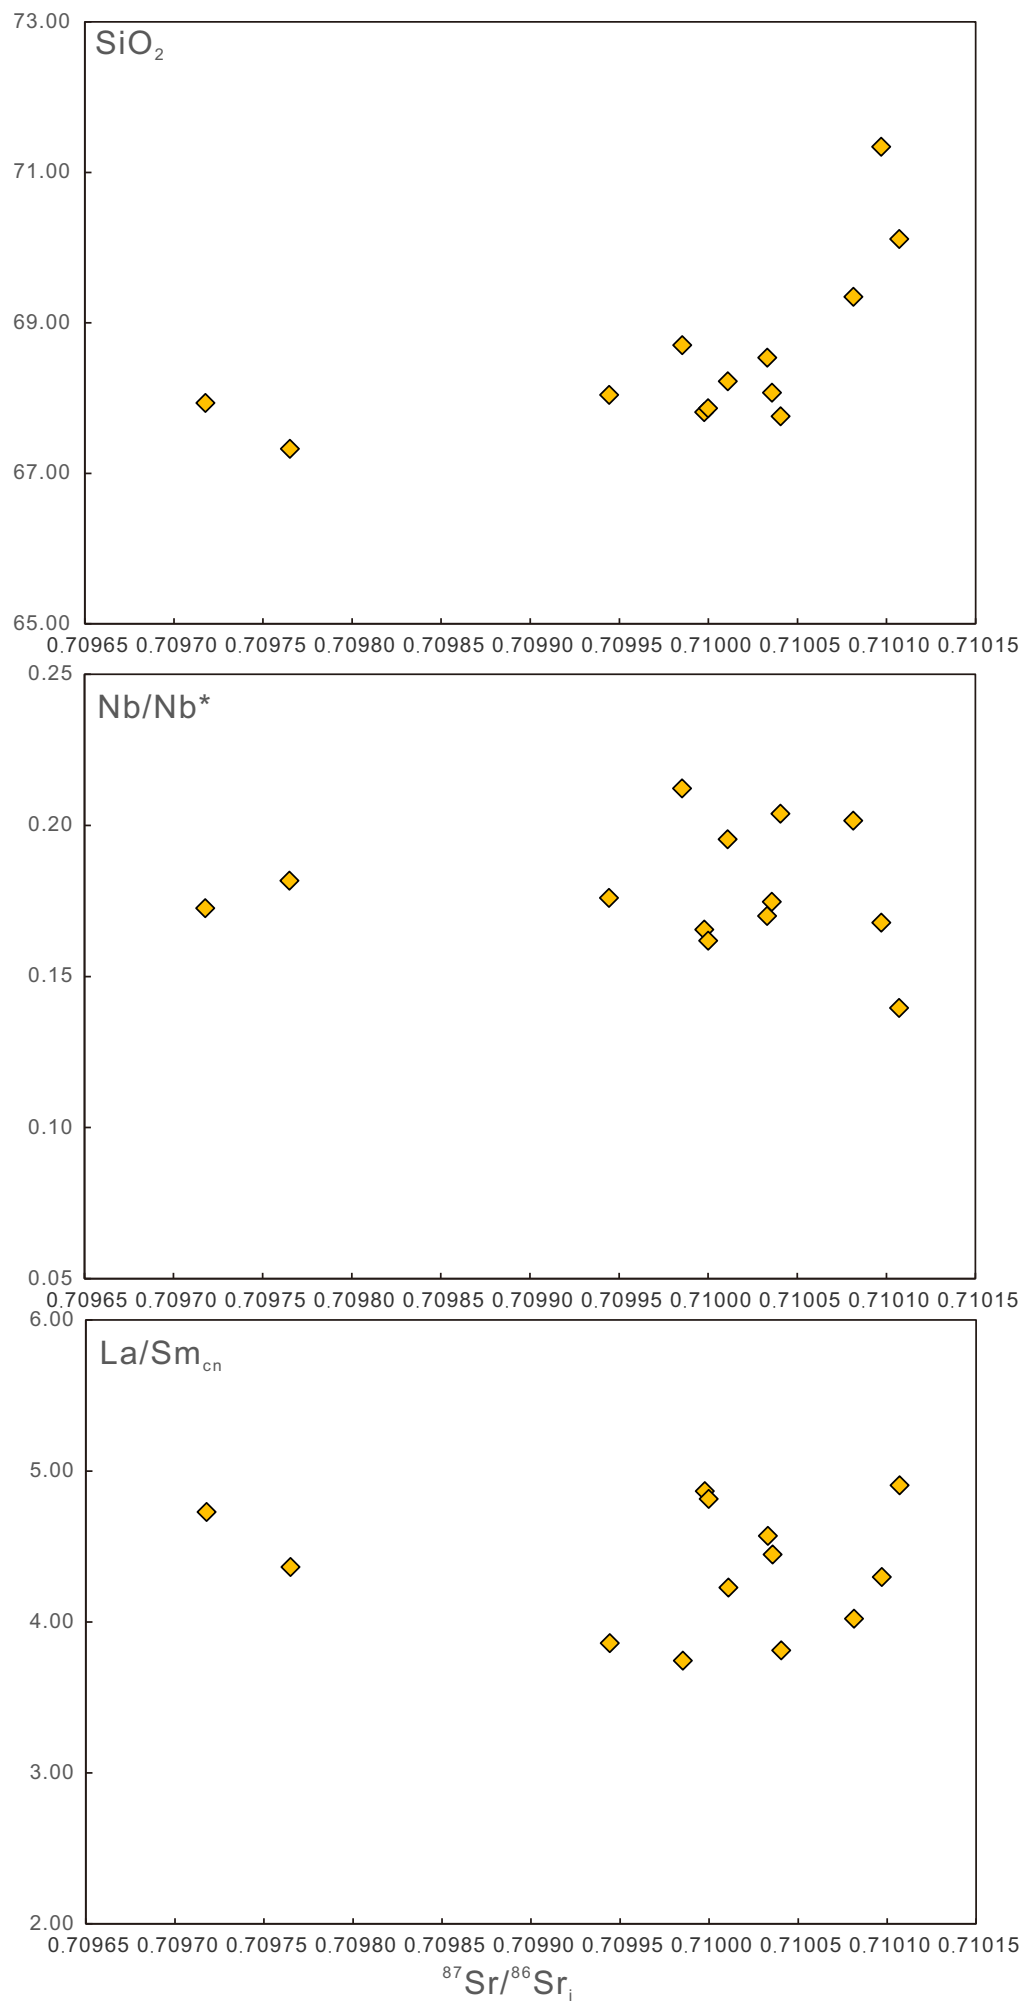

Fig. S4. Variation diagrams of SiO<sub>2</sub>, Nb/Nb\* and La/Sm<sub>cn</sub> versus  $^{87}\text{Sr}/^{86}\text{Sr}_i$  for the Gördes dacites.

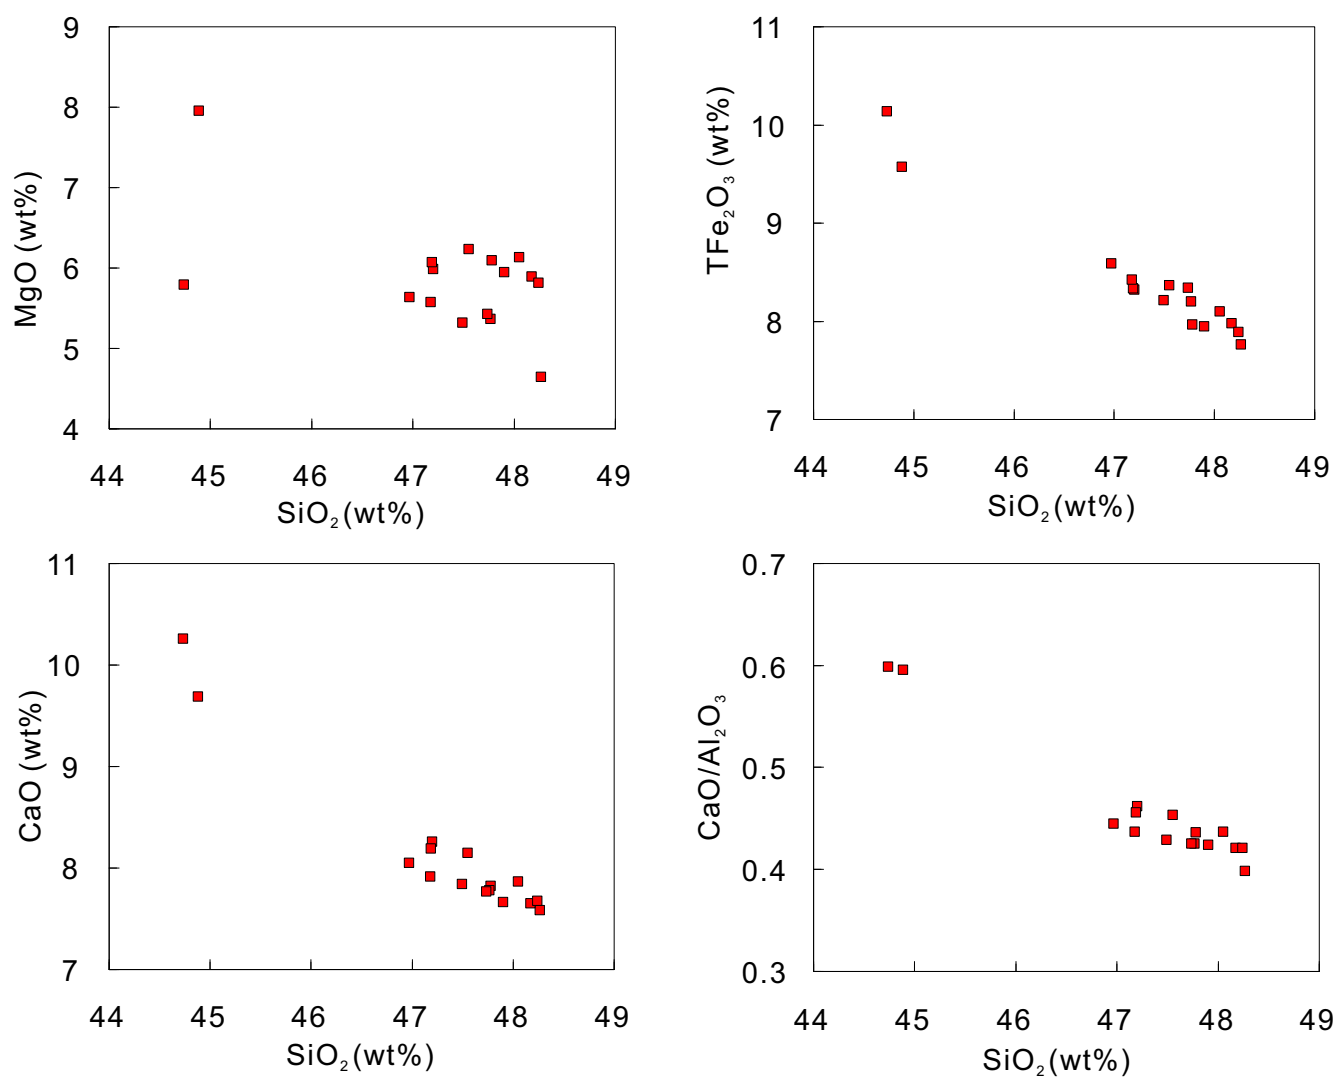

Fig. S5. Variation diagrams of  $\text{MgO}$ ,  $\text{TFe}_2\text{O}_3$ ,  $\text{CaO}$  and  $\text{CaO}/\text{Al}_2\text{O}_3$  versus  $\text{SiO}_2$  for the Kula basalts.

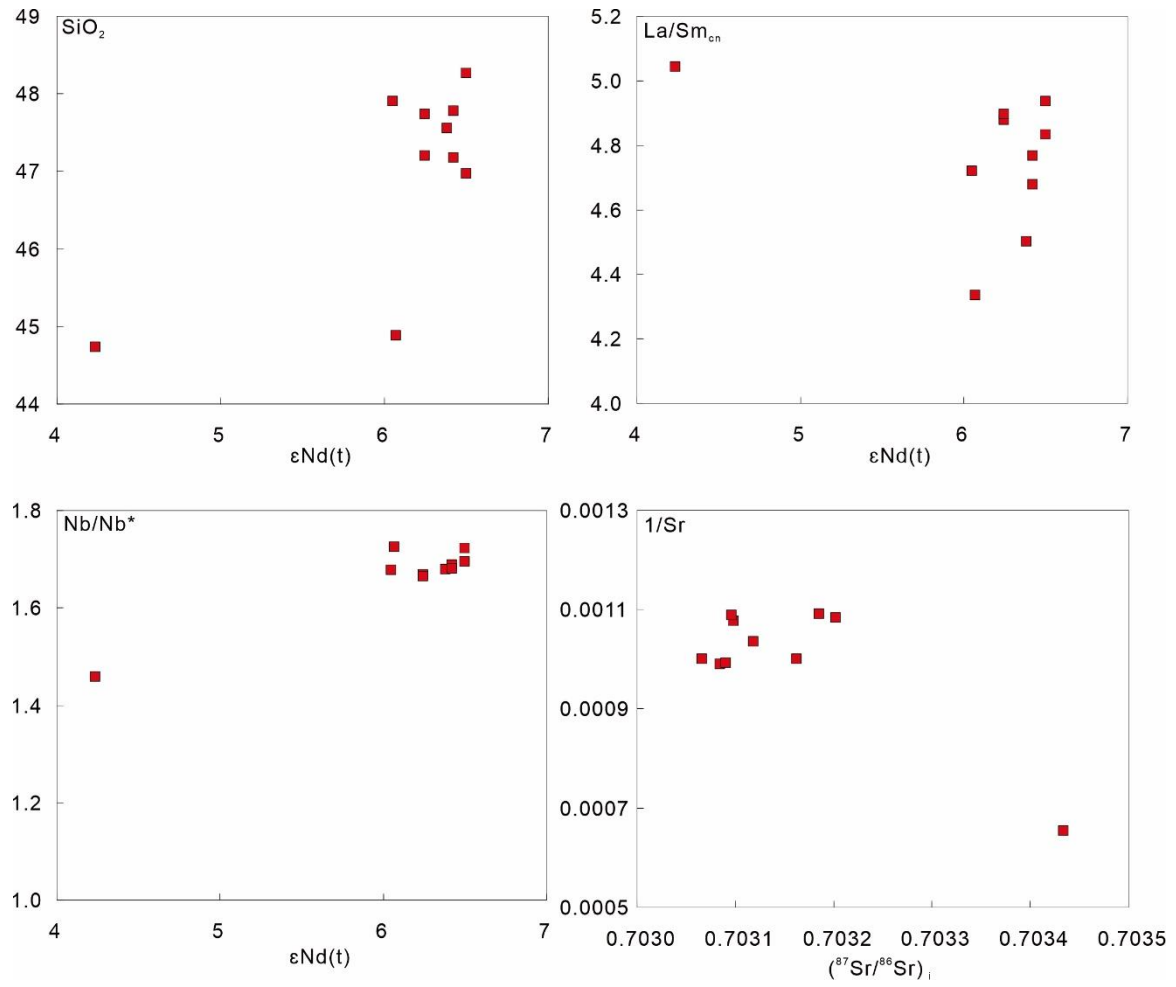

Fig. S6. Variation diagrams of  $\text{SiO}_2$ ,  $\text{La}/\text{Sm}_{\text{cn}}$ ,  $\text{Nb}/\text{Nb}^*$  versus  $\epsilon\text{Nd}(t)$  and  $1/\text{Sr}$  versus  $(^{87}\text{Sr}/^{86}\text{Sr})_i$  for the Kula basalts.

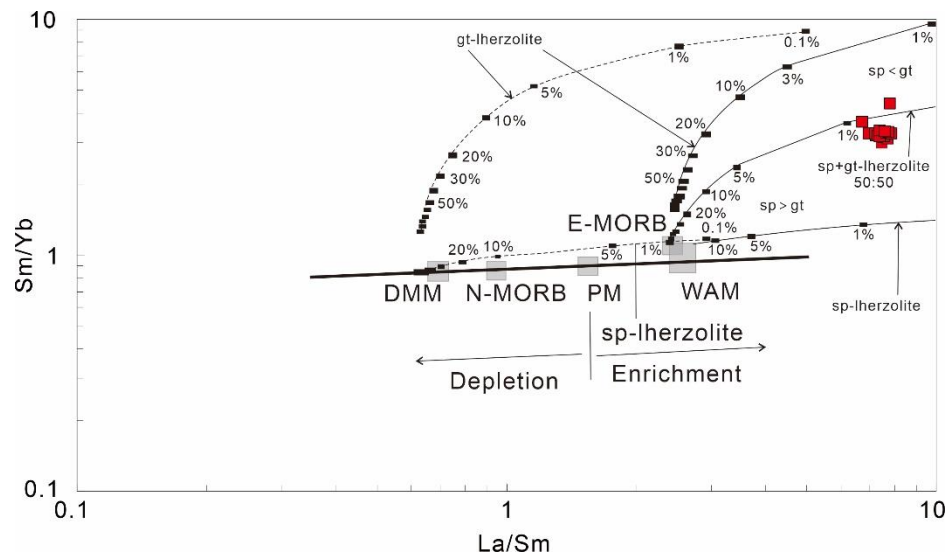

Fig. S7. Variation diagrams of  $\text{La/Sm}$  versus  $\text{Sm/Yb}$  (adopted from Aldanmaz et al., 2000).

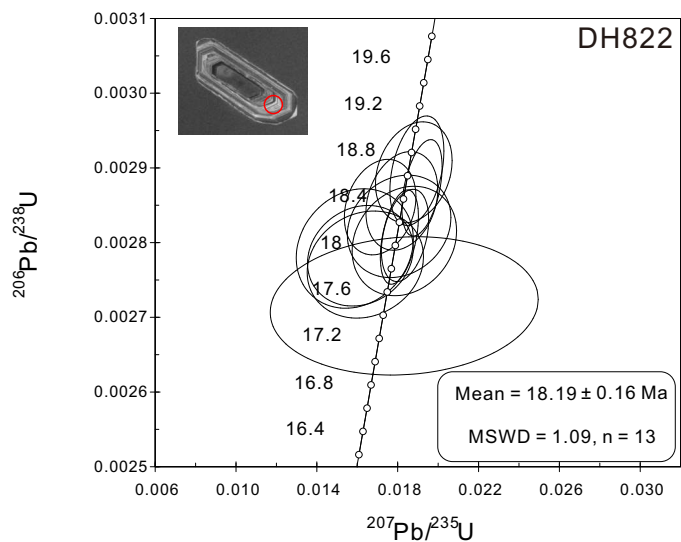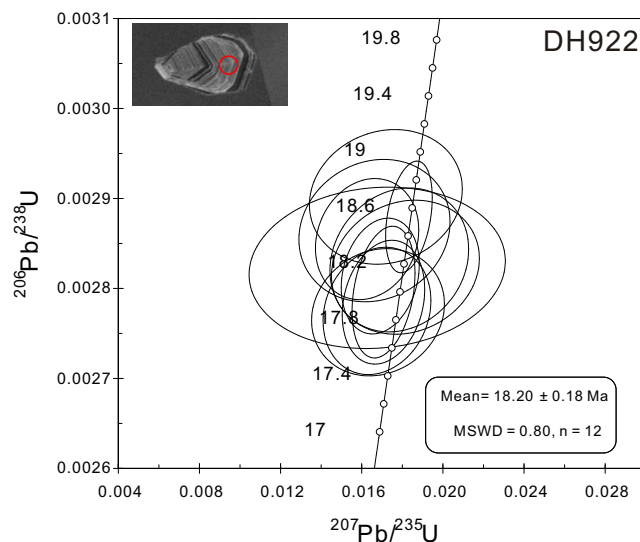

Fig. S8. Selected cathodoluminescence images and U-Pb concordia diagrams of analyzed zircons of dacites.

Table S1. SHRIMP U–Pb data for zircons from Gördes dacites

| Spot                | %<br><sup>206</sup> Pb/<br><sup>238</sup> U | ppm<br>U | ppm<br>Th | ppm<br><sup>232</sup> Th/ <sup>238</sup> U | ppm<br><sup>206</sup> Pb* | <sup>207</sup> Pb/ <sup>206</sup> Pb | err  | <sup>207</sup> Pb/ <sup>235</sup> U | err  | <sup>206</sup> Pb/ <sup>238</sup> U | err | Err corr | <sup>206</sup> Pb/ <sup>238</sup> U | err |
|---------------------|---------------------------------------------|----------|-----------|--------------------------------------------|---------------------------|--------------------------------------|------|-------------------------------------|------|-------------------------------------|-----|----------|-------------------------------------|-----|
| Sample 822DH dacite |                                             |          |           |                                            |                           |                                      |      |                                     |      |                                     |     |          |                                     |     |
| 822-01              | 0.69                                        | 688      | 135       | 0.20                                       | 1.7                       | 0.0412                               | 11.9 | 0.0159                              | 12.0 | .0028                               | 1.9 | .157     | 18.0                                | 0.3 |
| 822-02              | 1.83                                        | 630      | 129       | 0.21                                       | 1.5                       | 0.0489                               | 23.8 | 0.0183                              | 23.9 | .0027                               | 2.2 | .094     | 17.5                                | 0.4 |
| 822-03              | 1.14                                        | 954      | 294       | 0.32                                       | 2.3                       | 0.0421                               | 10.6 | 0.0162                              | 10.7 | .0028                               | 1.6 | .149     | 17.9                                | 0.3 |
| 822-04              | 0.72                                        | 1487     | 390       | 0.27                                       | 3.7                       | 0.0436                               | 6.7  | 0.0171                              | 6.8  | .0028                               | 1.5 | .217     | 18.3                                | 0.3 |
| 822-05              | 0.00                                        | 1045     | 288       | 0.29                                       | 2.5                       | 0.0467                               | 3.1  | 0.0181                              | 3.4  | .0028                               | 1.5 | .432     | 18.1                                | 0.3 |
| 822-06              | 0.00                                        | 597      | 163       | 0.28                                       | 1.5                       | 0.0475                               | 4.3  | 0.0189                              | 4.7  | .0029                               | 1.7 | .359     | 18.6                                | 0.3 |
| 822-07              | 0.75                                        | 794      | 172       | 0.22                                       | 1.9                       | 0.0429                               | 11.5 | 0.0164                              | 11.6 | .0028                               | 1.7 | .147     | 17.8                                | 0.3 |
| 822-08              | 0.00                                        | 1099     | 311       | 0.29                                       | 2.7                       | 0.0485                               | 3.1  | 0.0192                              | 3.4  | .0029                               | 1.5 | .434     | 18.5                                | 0.3 |
| 822-09              | 1.04                                        | 1141     | 197       | 0.18                                       | 2.8                       | 0.0464                               | 9.2  | 0.0181                              | 9.4  | .0028                               | 1.6 | .171     | 18.2                                | 0.3 |
| 822-10              | 0.47                                        | 949      | 217       | 0.24                                       | 2.4                       | 0.0471                               | 6.5  | 0.0188                              | 6.7  | .0029                               | 1.5 | .231     | 18.6                                | 0.3 |
| 822-11              | 0.71                                        | 642      | 125       | 0.20                                       | 1.6                       | 0.0474                               | 9.1  | 0.0183                              | 9.3  | .0028                               | 1.7 | .185     | 18.0                                | 0.3 |
| 822-12              | 0.45                                        | 939      | 292       | 0.32                                       | 2.3                       | 0.0462                               | 6.3  | 0.0182                              | 6.4  | .0029                               | 1.5 | .237     | 18.4                                | 0.3 |
| 822-13              | 0.40                                        | 1499     | 376       | 0.26                                       | 3.6                       | 0.0474                               | 3.9  | 0.0184                              | 4.2  | .0028                               | 1.5 | .345     | 18.1                                | 0.3 |
| Sample 922DH dacite |                                             |          |           |                                            |                           |                                      |      |                                     |      |                                     |     |          |                                     |     |
| 922-1               | 0.96                                        | 603      | 133       | 0.23                                       | 1.5                       | 0.0421                               | 14.7 | 0.0166                              | 14.8 | .0029                               | 1.8 | .123     | 18.4                                | 0.3 |
| 922-2               | 1.11                                        | 560      | 148       | 0.27                                       | 1.4                       | 0.0438                               | 10.3 | 0.0168                              | 10.5 | .0028                               | 1.7 | .161     | 17.9                                | 0.3 |
| 922-3               | 0.63                                        | 1592     | 576       | 0.37                                       | 3.8                       | 0.0443                               | 5.7  | 0.0171                              | 6.0  | .0028                               | 1.7 | .288     | 18.0                                | 0.3 |
| 922-4               | 1.02                                        | 1233     | 206       | 0.17                                       | 3.1                       | 0.0413                               | 10.2 | 0.0163                              | 10.3 | .0029                               | 1.6 | .151     | 18.4                                | 0.3 |
| 922-5               | 1.47                                        | 582      | 104       | 0.18                                       | 1.4                       | 0.0431                               | 24.8 | 0.0168                              | 24.9 | .0028                               | 2.1 | .084     | 18.2                                | 0.4 |
| 922-6               | 0.25                                        | 2347     | 519       | 0.23                                       | 5.8                       | 0.0462                               | 3.9  | 0.0183                              | 4.1  | .0029                               | 1.4 | .344     | 18.5                                | 0.3 |
| 922-7               | 0.91                                        | 736      | 155       | 0.22                                       | 1.9                       | 0.0430                               | 14.4 | 0.0172                              | 14.5 | .0029                               | 1.7 | .118     | 18.7                                | 0.3 |
| 922-8               | 0.91                                        | 855      | 255       | 0.31                                       | 2.1                       | 0.0445                               | 7.7  | 0.0171                              | 7.9  | .0028                               | 1.6 | .207     | 17.9                                | 0.3 |
| 922-9               | 0.70                                        | 1129     | 326       | 0.30                                       | 2.7                       | 0.0436                               | 7.4  | 0.0169                              | 7.5  | .0028                               | 1.5 | .201     | 18.1                                | 0.3 |
| 922-10              | 0.96                                        | 479      | 102       | 0.22                                       | 1.2                       | 0.0457                               | 12.5 | 0.0179                              | 12.6 | .0028                               | 1.9 | .147     | 18.2                                | 0.3 |

|        |      |     |     |      |     |        |      |        |      |       |     |      |      |     |
|--------|------|-----|-----|------|-----|--------|------|--------|------|-------|-----|------|------|-----|
| 922-11 | 0.56 | 906 | 185 | 0.21 | 2.2 | 0.0466 | 13.1 | 0.0182 | 13.3 | .0028 | 1.7 | .131 | 18.2 | 0.3 |
| 922-12 | 1.34 | 989 | 246 | 0.26 | 2.4 | 0.0439 | 12.7 | 0.0168 | 12.9 | .0028 | 1.7 | .131 | 17.9 | 0.3 |

---

Errors are 1-sigma and Pb\* indicates the radiogenic portions.

Data were  $^{204}\text{Pb}$  corrected, using measured values.

% discordance=% discordance defined as  $[(^{206}\text{Pb}/^{238}\text{Pb age})/(^{207}\text{Pb}/^{206}\text{Pb age})]\times 100$ .

Table S2. Major and trace elemental compositions of dacites and basalts

| Sample No                       | 919DH          | 920DH | 820DH  | 821DH  | 822DH | 824DH  | 921DH  | 922DH | 923DH | 924DH | 926DH  | 927DH | 928DH  | 929DH  | 930DH  |
|---------------------------------|----------------|-------|--------|--------|-------|--------|--------|-------|-------|-------|--------|-------|--------|--------|--------|
| Rock type                       | Altered dacite |       |        | Dacite |       |        |        |       |       |       |        |       |        |        |        |
| SiO <sub>2</sub>                | 71.26          | 69.98 | 67.33  | 67.94  | 67.82 | 67.87  | 68.04  | 70.12 | 68.54 | 67.76 | 69.35  | 68.07 | 68.23  | 68.71  | 71.34  |
| TiO <sub>2</sub>                | 0.09           | 0.08  | 0.49   | 0.50   | 0.49  | 0.52   | 0.51   | 0.35  | 0.50  | 0.48  | 0.45   | 0.48  | 0.50   | 0.49   | 0.36   |
| Al <sub>2</sub> O <sub>3</sub>  | 12.11          | 12.61 | 15.31  | 15.26  | 15.37 | 15.28  | 15.29  | 14.23 | 14.89 | 15.03 | 15.07  | 15.13 | 15.06  | 15.00  | 14.29  |
| TFe <sub>2</sub> O <sub>3</sub> | 0.99           | 0.41  | 3.73   | 3.82   | 3.58  | 3.70   | 3.63   | 2.72  | 3.64  | 3.56  | 3.32   | 3.52  | 3.58   | 3.52   | 2.85   |
| MnO                             | 0.00           | 0.01  | 0.08   | 0.07   | 0.08  | 0.08   | 0.07   | 0.08  | 0.06  | 0.07  | 0.08   | 0.09  | 0.06   | 0.06   | 0.06   |
| MgO                             | 0.82           | 0.94  | 1.32   | 1.43   | 1.58  | 1.82   | 1.51   | 1.25  | 1.63  | 1.60  | 1.38   | 1.65  | 1.82   | 1.51   | 1.19   |
| CaO                             | 3.33           | 3.68  | 3.74   | 3.77   | 3.65  | 3.61   | 3.29   | 2.62  | 3.43  | 3.57  | 3.31   | 3.51  | 3.36   | 3.14   | 2.57   |
| Na <sub>2</sub> O               | 0.66           | 0.89  | 3.03   | 3.00   | 3.39  | 3.24   | 3.05   | 3.19  | 3.12  | 3.22  | 3.17   | 3.25  | 3.00   | 3.03   | 3.06   |
| K <sub>2</sub> O                | 2.16           | 1.87  | 3.60   | 3.53   | 3.17  | 3.19   | 3.35   | 3.80  | 3.20  | 3.22  | 3.43   | 3.21  | 3.30   | 3.45   | 3.97   |
| P <sub>2</sub> O <sub>5</sub>   | 0.02           | 0.02  | 0.11   | 0.11   | 0.10  | 0.14   | 0.12   | 0.08  | 0.11  | 0.15  | 0.11   | 0.12  | 0.15   | 0.16   | 0.09   |
| LOI                             | 7.93           | 8.95  | 0.77   | 0.76   | 0.48  | 0.57   | 1.36   | 1.04  | 0.66  | 0.87  | 0.44   | 0.56  | 1.16   | 1.35   | 0.64   |
| SUM                             | 99.36          | 99.45 | 99.50  | 100.19 | 99.72 | 100.01 | 100.23 | 99.46 | 99.78 | 99.53 | 100.11 | 99.60 | 100.22 | 100.42 | 100.41 |
| Li                              | 6.57           | 5.09  | 43.80  | 44.4   | 50.9  | 49.5   | 50.6   | 53.1  | 49.3  | 46.9  | 50.3   | 47.6  | 46.3   | 44.4   | 60.3   |
| Be                              | 3.16           | 3.59  | 2.63   | 2.57   | 2.80  | 2.80   | 2.99   | 2.90  | 2.81  | 2.65  | 2.89   | 2.74  | 2.77   | 2.56   | 3.13   |
| Sc                              | 2.68           | 2.40  | 11.19  | 10.8   | 9.93  | 10.2   | 9.70   | 7.51  | 10.2  | 9.84  | 8.78   | 9.62  | 9.17   | 9.69   | 7.71   |
| V                               | 4.44           | 4.56  | 81.75  | 81.0   | 44.2  | 46.0   | 45.2   | 35.1  | 46.1  | 43.4  | 40.0   | 43.6  | 42.5   | 44.4   | 35.2   |
| Cr                              | 40.7           | 31.2  | 105.62 | 114    | 96.2  | 96.3   | 60.1   | 78.9  | 116   | 92.1  | 89.2   | 103   | 78.9   | 98.5   | 127    |
| Co                              | 0.92           | 0.75  | 10.03  | 10.1   | 8.85  | 9.55   | 16.6   | 7.15  | 8.41  | 9.08  | 8.11   | 8.84  | 8.94   | 8.11   | 7.42   |
| Ni                              | 4.74           | 6.29  | 16.22  | 17.0   | 9.14  | 9.68   | 8.51   | 8.85  | 10.4  | 9.04  | 9.52   | 10.8  | 14.8   | 9.34   | 10.1   |
| Cu                              | 2.34           | 1.83  | 9.91   | 9.78   | 7.37  | 8.05   | 7.38   | 5.88  | 7.88  | 7.53  | 6.37   | 7.81  | 7.53   | 7.07   | 6.93   |
| Zn                              | 21.6           | 14.7  | 44.74  | 44.6   | 41.0  | 44.4   | 106    | 34.7  | 43.3  | 42.9  | 39.4   | 41.4  | 40.4   | 38.7   | 35.0   |
| Ga                              | 13.5           | 13.9  | 16.87  | 16.8   | 16.7  | 16.9   | 16.9   | 15.8  | 16.6  | 16.4  | 16.6   | 16.7  | 16.4   | 15.7   | 15.9   |
| Rb                              | 156            | 120   | 125.83 | 125    | 117   | 118    | 119    | 138   | 112   | 113   | 121    | 117   | 114    | 118    | 134    |
| Sr                              | 429            | 691   | 316.85 | 311    | 334   | 293    | 281    | 216   | 276   | 290   | 290    | 307   | 268    | 285    | 220    |
| Y                               | 27.8           | 22.1  | 24.72  | 24.3   | 25.6  | 25.1   | 38.5   | 30.8  | 23.8  | 24.5  | 23.5   | 26.5  | 23.9   | 20.7   | 25.4   |
| Zr                              | 87.2           | 93.7  | 134.85 | 138    | 136   | 144    | 174    | 118   | 145   | 137   | 139    | 136   | 137    | 149    | 113    |
| Nb                              | 15.9           | 15.8  | 11.91  | 12.3   | 12.0  | 12.4   | 12.4   | 12.4  | 12.1  | 12.1  | 12.4   | 12.0  | 12.1   | 12.3   | 11.8   |
| Sn                              | 3.57           | 3.74  | 4.45   | 4.70   | 3.54  | 3.56   | 2.61   | 3.68  | 3.66  | 2.09  | 3.32   | 3.12  | 2.61   | 2.55   | 2.82   |
| Cs                              | 9.29           | 4.15  | 7.35   | 6.37   | 6.31  | 5.76   | 6.00   | 7.29  | 6.39  | 6.23  | 6.96   | 6.22  | 5.12   | 6.38   | 9.93   |

|       |          |          |          |          |          |          |          |           |           |           |           |           |           |           |           |
|-------|----------|----------|----------|----------|----------|----------|----------|-----------|-----------|-----------|-----------|-----------|-----------|-----------|-----------|
| Ba    | 123      | 1093     | 713.17   | 711      | 658      | 689      | 737      | 658       | 641       | 683       | 722       | 715       | 751       | 663       | 625       |
| La    | 23.2     | 22.2     | 32.76    | 36.1     | 37.3     | 39.8     | 37.7     | 42.8      | 36.1      | 28.5      | 29.3      | 35.1      | 30.6      | 27.1      | 32.6      |
| Ce    | 44.3     | 45.2     | 61.37    | 67.8     | 69.9     | 74.9     | 69.2     | 80.5      | 68.5      | 56.9      | 56.4      | 67.4      | 58.3      | 53.1      | 62.3      |
| Pr    | 5.34     | 5.15     | 6.71     | 7.28     | 7.26     | 7.81     | 7.95     | 8.22      | 7.37      | 6.09      | 6.01      | 7.06      | 6.21      | 5.74      | 6.48      |
| Nd    | 19.8     | 19.2     | 25.04    | 26.2     | 26.7     | 28.7     | 30.1     | 29.5      | 26.3      | 23.0      | 22.8      | 25.9      | 23.3      | 21.9      | 24.1      |
| Sm    | 4.38     | 4.39     | 4.85     | 4.92     | 4.95     | 5.34     | 6.31     | 5.63      | 5.11      | 4.83      | 4.70      | 5.10      | 4.67      | 4.67      | 4.89      |
| Eu    | 0.26     | 0.25     | 0.96     | 0.97     | 0.97     | 0.93     | 1.22     | 0.80      | 0.93      | 0.95      | 0.91      | 1.04      | 0.96      | 0.87      | 0.83      |
| Gd    | 3.97     | 4.08     | 4.17     | 4.50     | 4.34     | 4.60     | 6.06     | 5.07      | 4.51      | 4.69      | 4.16      | 4.48      | 4.48      | 3.96      | 4.30      |
| Tb    | 0.66     | 0.67     | 0.69     | 0.65     | 0.67     | 0.72     | 1.02     | 0.79      | 0.73      | 0.73      | 0.71      | 0.69      | 0.75      | 0.62      | 0.70      |
| Dy    | 4.19     | 3.90     | 4.17     | 4.30     | 4.16     | 4.38     | 6.41     | 4.88      | 4.38      | 4.34      | 4.28      | 4.48      | 4.18      | 3.66      | 4.33      |
| Ho    | 0.91     | 0.75     | 0.88     | 0.87     | 0.85     | 0.84     | 1.33     | 0.98      | 0.86      | 0.89      | 0.84      | 0.93      | 0.90      | 0.73      | 0.87      |
| Er    | 2.53     | 2.15     | 2.42     | 2.43     | 2.45     | 2.53     | 3.82     | 2.89      | 2.47      | 2.47      | 2.42      | 2.59      | 2.46      | 2.12      | 2.42      |
| Tm    | 0.39     | 0.32     | 0.37     | 0.37     | 0.37     | 0.39     | 0.56     | 0.44      | 0.36      | 0.35      | 0.36      | 0.38      | 0.37      | 0.31      | 0.37      |
| Yb    | 2.62     | 2.09     | 2.35     | 2.37     | 2.50     | 2.47     | 3.61     | 2.90      | 2.44      | 2.44      | 2.41      | 2.52      | 2.44      | 2.10      | 2.55      |
| Lu    | 0.40     | 0.31     | 0.36     | 0.38     | 0.37     | 0.38     | 0.55     | 0.45      | 0.37      | 0.37      | 0.38      | 0.40      | 0.39      | 0.34      | 0.38      |
| Hf    | 3.32     | 3.62     | 3.95     | 3.83     | 3.90     | 4.14     | 4.69     | 3.63      | 4.19      | 3.98      | 4.04      | 3.96      | 3.88      | 4.22      | 3.42      |
| Ta    | 1.48     | 1.57     | 1.22     | 1.25     | 1.25     | 1.22     | 1.26     | 1.56      | 1.24      | 1.21      | 1.33      | 1.28      | 1.24      | 1.30      | 1.46      |
| Tl    | 0.59     | 1.10     | 0.84     | 0.81     | 0.79     | 0.96     | 0.76     | 0.83      | 1.16      | 0.73      | 0.73      | 0.78      | 0.70      | 0.72      | 0.67      |
| Pb    | 18.1     | 21.7     | 37.49    | 37.3     | 34.3     | 32.8     | 52.6     | 39.0      | 40.2      | 35.5      | 37.1      | 31.1      | 35.7      | 34.5      | 40.7      |
| Th    | 29.3     | 31.0     | 15.07    | 16.1     | 16.2     | 16.8     | 15.1     | 21.2      | 16.0      | 14.3      | 14.8      | 15.5      | 14.4      | 14.1      | 17.5      |
| U     | 4.86     | 5.46     | 4.63     | 4.83     | 4.29     | 4.67     | 4.43     | 6.03      | 4.47      | 3.94      | 4.17      | 4.51      | 4.15      | 4.39      | 4.92      |
| North | 38.58319 | 38.58319 | 38.92379 | 38.92379 | 38.89518 | 38.89518 | 38.57195 | 38°54'39" | 38.568889 | 38.568889 | 38.568889 | 38.588056 | 38.596111 | 38.596389 | 38.613611 |
| East  | 28.63559 | 28.63559 | 28.20033 | 28.20033 | 28.11762 | 28.11762 | 28.6493  | 28°11'34" | 28.652222 | 28.652222 | 28.652222 | 28.664167 | 28.677778 | 28.6775   | 28.687222 |

Table S1. Continued

| Sample No | 825DH  | 831DH | 836DH | 843DH | 844DH | 912DH | 913DH | 914DH | 915DH | 916DH | 917DH | 918DH | 932DH | 933DH | 935DH | 936DH | 937DH |
|-----------|--------|-------|-------|-------|-------|-------|-------|-------|-------|-------|-------|-------|-------|-------|-------|-------|-------|
| Rock type | Basalt |       |       |       |       |       |       |       |       |       |       |       |       |       |       |       |       |
| SiO2      | 47.96  | 48.27 | 48.17 | 44.74 | 47.55 | 47.78 | 48.05 | 47.90 | 48.24 | 47.20 | 47.19 | 44.88 | 46.97 | 47.18 | 47.77 | 47.49 | 47.74 |
| TiO2      | 1.81   | 1.84  | 1.79  | 2.27  | 1.87  | 1.79  | 1.81  | 1.77  | 1.76  | 1.90  | 1.91  | 2.32  | 1.98  | 1.93  | 1.86  | 1.89  | 1.89  |
| Al2O3     | 18.21  | 19.05 | 18.19 | 17.14 | 17.97 | 17.94 | 18.01 | 18.07 | 18.24 | 17.88 | 17.97 | 16.26 | 18.09 | 18.13 | 18.31 | 18.28 | 18.26 |
| TFE2O3    | 7.97   | 7.76  | 7.98  | 10.14 | 8.37  | 7.96  | 8.10  | 7.95  | 7.89  | 8.32  | 8.33  | 9.57  | 8.59  | 8.42  | 8.20  | 8.21  | 8.34  |
| MnO       | 0.14   | 0.14  | 0.14  | 0.16  | 0.15  | 0.14  | 0.14  | 0.14  | 0.14  | 0.15  | 0.15  | 0.16  | 0.15  | 0.15  | 0.15  | 0.15  | 0.16  |
| MgO       | 5.63   | 4.64  | 5.89  | 5.79  | 6.23  | 6.09  | 6.14  | 5.95  | 5.82  | 5.99  | 6.07  | 7.96  | 5.63  | 5.57  | 5.36  | 5.32  | 5.43  |
| CaO       | 7.68   | 7.58  | 7.65  | 10.26 | 8.15  | 7.83  | 7.86  | 7.66  | 7.68  | 8.26  | 8.19  | 9.69  | 8.05  | 7.91  | 7.78  | 7.84  | 7.77  |

|             |       |       |       |       |        |       |       |       |       |       |       |       |       |       |       |       |       |
|-------------|-------|-------|-------|-------|--------|-------|-------|-------|-------|-------|-------|-------|-------|-------|-------|-------|-------|
| <b>Na2O</b> | 5.72  | 6.03  | 5.72  | 4.93  | 5.70   | 5.65  | 5.56  | 5.68  | 5.74  | 5.60  | 5.53  | 4.55  | 5.69  | 5.78  | 5.95  | 5.88  | 6.00  |
| <b>K2O</b>  | 3.60  | 3.79  | 3.68  | 2.45  | 3.61   | 3.52  | 3.55  | 3.62  | 3.65  | 3.55  | 3.51  | 2.67  | 3.55  | 3.64  | 3.53  | 3.62  | 3.67  |
| <b>P2O5</b> | 0.75  | 0.77  | 0.82  | 1.22  | 0.78   | 0.79  | 0.80  | 0.80  | 0.80  | 0.81  | 0.80  | 0.99  | 0.95  | 0.91  | 0.87  | 0.87  | 0.88  |
| <b>LOI</b>  | -0.25 | -0.09 | -0.08 | 0.26  | -0.22  | -0.05 | -0.05 | -0.14 | -0.34 | -0.28 | 0.04  | 0.30  | -0.10 | -0.21 | -0.14 | -0.22 | -0.30 |
| <b>SUM</b>  | 99.21 | 99.77 | 99.94 | 99.35 | 100.16 | 99.44 | 99.97 | 99.39 | 99.60 | 99.37 | 99.69 | 99.35 | 99.55 | 99.41 | 99.65 | 99.32 | 99.82 |
|             |       |       |       |       |        |       |       |       |       |       |       |       |       |       |       |       |       |
| Li          | 9.37  | 10.2  | 10.7  | 11.9  | 9.67   | 10.4  | 10.3  | 10.4  | 10.7  | 10.3  | 8.74  | 6.73  | 8.36  | 9.42  | 9.32  | 9.19  | 9.95  |
| Be          | 2.19  | 2.36  | 2.52  | 2.37  | 2.34   | 2.33  | 2.55  | 2.44  | 2.35  | 2.50  | 2.37  | 2.00  | 2.52  | 2.44  | 2.56  | 2.58  | 2.68  |
| Sc          | 16.5  | 14.8  | 14.6  | 16.4  | 15.8   | 15.1  | 15.6  | 14.9  | 14.3  | 16.4  | 16.6  | 22.1  | 15.1  | 15.0  | 14.5  | 14.6  | 14.3  |
| V           | 148   | 144   | 143   | 227   | 155    | 146   | 149   | 146   | 143   | 165   | 162   | 216   | 157   | 155   | 146   | 149   | 147   |
| Cr          | 147   | 107   | 112   | 88.2  | 123    | 143   | 176   | 127   | 126   | 145   | 134   | 175   | 175   | 110   | 128   | 151   | 150   |
| Co          | 28.5  | 25.1  | 28.9  | 35.5  | 28.6   | 29.3  | 30.4  | 29.0  | 28.0  | 31.2  | 29.3  | 39.9  | 28.8  | 28.8  | 26.2  | 27.9  | 27.0  |
| Ni          | 62.4  | 39.7  | 75.4  | 32.5  | 70.1   | 80.5  | 85.1  | 77.8  | 75.2  | 70.4  | 68.5  | 103   | 58.1  | 57.4  | 55.7  | 56.5  | 57.9  |
| Cu          | 32.6  | 30.7  | 32.6  | 33.4  | 29.8   | 32.8  | 35.2  | 32.8  | 31.9  | 33.2  | 31.9  | 40.3  | 32.8  | 31.7  | 31.4  | 31.8  | 31.4  |
| Zn          | 69.1  | 68.1  | 69.7  | 89.6  | 69.8   | 69.2  | 71.2  | 71.6  | 69.9  | 72.9  | 74.4  | 79.0  | 73.7  | 74.6  | 72.0  | 72.1  | 72.5  |
| Ga          | 19.5  | 20.2  | 19.4  | 20.6  | 19.7   | 19.2  | 19.9  | 19.3  | 19.5  | 20.2  | 20.5  | 19.5  | 19.9  | 20.9  | 20.1  | 19.9  | 20.1  |
| Rb          | 78.1  | 82.7  | 82.4  | 64.6  | 77.1   | 79.0  | 79.3  | 81.2  | 82.7  | 79.9  | 78.9  | 87.3  | 76.2  | 79.2  | 76.5  | 75.5  | 80.3  |
| Sr          | 899   | 929   | 931   | 1529  | 919    | 923   | 923   | 917   | 934   | 966   | 933   | 1000  | 999   | 1010  | 1008  | 993   | 1008  |
| Y           | 23.3  | 23.2  | 23.7  | 30.8  | 23.5   | 23.7  | 23.9  | 23.6  | 23.8  | 25.0  | 24.4  | 27.8  | 25.8  | 26.0  | 25.3  | 25.5  | 25.2  |
| Zr          | 216   | 225   | 228   | 251   | 218    | 225   | 222   | 222   | 227   | 228   | 223   | 215   | 245   | 254   | 253   | 249   | 254   |
| Nb          | 91.7  | 96.4  | 96.7  | 127   | 94.5   | 96.4  | 96.7  | 94.9  | 98.6  | 100   | 98.0  | 99.2  | 106   | 109   | 107   | 106   | 106   |
| Sn          | 1.81  | 1.65  | 1.69  | 1.81  | 1.67   | 1.71  | 1.74  | 1.65  | 1.59  | 1.63  | 1.67  | 1.69  | 1.76  | 1.69  | 1.81  | 2.02  | 1.77  |
| Cs          | 1.31  | 1.31  | 1.35  | 1.18  | 1.27   | 1.32  | 1.28  | 1.33  | 1.29  | 1.31  | 1.23  | 1.04  | 1.17  | 1.27  | 1.21  | 1.25  | 1.28  |
| Ba          | 860   | 895   | 892   | 1071  | 879    | 899   | 874   | 879   | 898   | 905   | 893   | 963   | 899   | 932   | 928   | 920   | 917   |
| La          | 46.2  | 47.0  | 49.4  | 85.3  | 47.6   | 48.3  | 48.8  | 48.0  | 50.1  | 51.7  | 49.8  | 54.2  | 56.0  | 56.4  | 56.1  | 56.6  | 55.0  |
| Ce          | 79.0  | 80.8  | 84.4  | 154   | 83.4   | 83.5  | 84.1  | 82.9  | 85.6  | 89.3  | 85.8  | 97.1  | 94.8  | 97.3  | 96.0  | 96.4  | 95.0  |
| Pr          | 8.43  | 8.44  | 8.88  | 16.2  | 8.92   | 8.93  | 8.89  | 8.98  | 9.13  | 9.66  | 9.28  | 10.7  | 10.2  | 10.6  | 10.2  | 10.2  | 10.0  |
| Nd          | 32.8  | 32.5  | 34.2  | 62.3  | 33.9   | 33.8  | 33.6  | 34.1  | 34.3  | 35.8  | 35.0  | 41.8  | 39.0  | 39.1  | 38.7  | 38.9  | 38.6  |
| Sm          | 6.13  | 6.27  | 6.56  | 10.9  | 6.82   | 6.66  | 6.77  | 6.57  | 6.48  | 6.84  | 6.73  | 8.07  | 7.32  | 7.64  | 7.13  | 7.32  | 7.25  |
| Eu          | 1.94  | 2.03  | 2.02  | 3.23  | 2.07   | 2.08  | 2.08  | 1.90  | 2.07  | 2.18  | 2.19  | 2.56  | 2.41  | 2.38  | 2.35  | 2.28  | 2.32  |
| Gd          | 5.38  | 5.49  | 5.79  | 8.69  | 5.69   | 5.68  | 5.70  | 5.61  | 5.74  | 5.95  | 5.79  | 7.01  | 6.28  | 6.23  | 6.13  | 6.25  | 6.06  |
| Tb          | 0.77  | 0.81  | 0.83  | 1.12  | 0.81   | 0.78  | 0.81  | 0.81  | 0.79  | 0.91  | 0.83  | 0.98  | 0.88  | 0.88  | 0.86  | 0.87  | 0.88  |
| Dy          | 4.58  | 4.68  | 4.52  | 6.28  | 4.61   | 4.64  | 4.77  | 4.60  | 4.66  | 5.09  | 4.70  | 5.32  | 5.02  | 5.05  | 4.77  | 5.00  | 4.84  |

|       |          |          |          |           |          |           |           |           |           |           |           |           |           |           |           |           |           |
|-------|----------|----------|----------|-----------|----------|-----------|-----------|-----------|-----------|-----------|-----------|-----------|-----------|-----------|-----------|-----------|-----------|
| Ho    | 0.85     | 0.87     | 0.83     | 1.14      | 0.85     | 0.86      | 0.90      | 0.84      | 0.90      | 0.94      | 0.92      | 0.96      | 0.98      | 0.97      | 0.89      | 0.94      | 0.91      |
| Er    | 2.32     | 2.34     | 2.36     | 2.95      | 2.30     | 2.35      | 2.44      | 2.35      | 2.33      | 2.45      | 2.42      | 2.62      | 2.50      | 2.60      | 2.51      | 2.52      | 2.55      |
| Tm    | 0.33     | 0.32     | 0.33     | 0.37      | 0.32     | 0.32      | 0.32      | 0.33      | 0.32      | 0.33      | 0.32      | 0.35      | 0.36      | 0.36      | 0.35      | 0.35      | 0.35      |
| Yb    | 1.96     | 2.10     | 2.08     | 2.49      | 2.08     | 2.08      | 2.07      | 2.05      | 2.09      | 2.16      | 2.12      | 2.21      | 2.22      | 2.26      | 2.18      | 2.21      | 2.18      |
| Lu    | 0.30     | 0.32     | 0.31     | 0.34      | 0.30     | 0.31      | 0.30      | 0.30      | 0.30      | 0.32      | 0.31      | 0.32      | 0.34      | 0.34      | 0.33      | 0.33      | 0.32      |
| Hf    | 4.50     | 4.48     | 4.44     | 4.76      | 4.45     | 4.44      | 4.48      | 4.42      | 4.44      | 4.53      | 4.47      | 4.58      | 4.95      | 5.23      | 4.88      | 4.94      | 4.93      |
| Ta    | 4.92     | 5.12     | 5.30     | 5.99      | 5.09     | 5.16      | 5.16      | 5.13      | 5.34      | 5.41      | 5.34      | 5.35      | 5.83      | 6.05      | 5.90      | 5.81      | 5.87      |
| Tl    | 0.10     | 0.076    | 0.085    | 0.078     | 0.073    | 0.094     | 0.096     | 0.090     | 0.097     | 0.096     | 0.059     | 0.12      | 0.075     | 0.083     | 0.12      | 0.099     | 0.099     |
| Pb    | 4.20     | 6.00     | 6.30     | 7.20      | 4.98     | 6.24      | 5.56      | 5.93      | 5.83      | 5.06      | 4.12      | 4.00      | 4.57      | 4.50      | 5.16      | 5.49      | 4.97      |
| Th    | 7.43     | 7.66     | 7.79     | 10.2      | 7.65     | 7.75      | 7.43      | 7.65      | 7.85      | 7.99      | 7.57      | 7.01      | 8.06      | 8.50      | 8.23      | 8.19      | 8.48      |
| U     | 2.14     | 2.28     | 2.35     | 2.86      | 2.14     | 2.43      | 2.18      | 2.30      | 2.33      | 2.29      | 2.26      | 2.08      | 2.43      | 2.63      | 2.38      | 2.42      | 2.38      |
| North | 38.57416 | 38.57416 | 38.57805 | 38.594722 | 38.59333 | 38.586367 | 38.578197 | 38.596569 | 38.606456 | 38.586708 | 38.619458 | 38.778117 | 38.614711 | 38.620167 | 38.637878 | 38.638119 | 38.636769 |
| East  | 28.55361 | 28.55361 | 28.55361 | 28.558333 | 28.55777 | 28.703461 | 28.690011 | 28.703564 | 28.699878 | 28.513625 | 28.531469 | 28.538592 | 28.412781 | 28.399275 | 28.419219 | 28.420522 | 28.443214 |

Table S3. Measured and recommended trace element concentrations (ppm) for AGV-2, BHVO-2, BCR-2 and RGM2

| Sample no.   | BLANK  | AGV-2  | AGV-2 | BHVO-2 | BHVO-2 | BCR-2  | BCR-2 | RGM-2  | RGM-2 | 820DH  | 914DH  | 927DH  | 820DH* | 914DH* | 927DH* |
|--------------|--------|--------|-------|--------|--------|--------|-------|--------|-------|--------|--------|--------|--------|--------|--------|
| Analysis No. | Sample | Sample | Ref   | Sample | Ref    | Sample | Ref   | Sample | Ref   | Sample | Sample | Sample | D*     | D*     | D*     |
| Li           | 0.0237 | 10.0   | 11.0  | 4.35   | 4.80   | 8.83   | 9.00  | 58.8   | 57.0  | 43.8   | 10.4   | 47.6   | 44.2   | 10.6   | 48.2   |
| Be           | 0.0000 | 2.11   | 2.30  | 1.05   | 1.00   | 2.33   |       | 2.54   | 2.37  | 2.63   | 2.44   | 2.74   | 2.58   | 2.48   | 2.89   |
| Sc           | 0.0446 | 12.2   | 13.0  | 32.1   | 32.0   | 33.8   | 33.0  | 4.45   | 4.40  | 11.2   | 14.9   | 9.62   | 10.8   | 15.1   | 9.48   |
| V            | 0.1607 | 116    | 120   | 320    | 317    | 419    | 416   | 11.8   | 13.0  | 81.7   | 146    | 43.6   | 80.8   | 145    | 42.6   |
| Cr           | 0.0339 | 14.9   | 16.2  | 291    | 280    | 14.8   | 16.5  | 2.66   | 5.90  | 106    | 127    | 103    | 99.6   | 131    | 115    |
| Co           | 0.0065 | 15.0   | 16.0  | 46.3   | 45.0   | 36.8   | 37.0  | 2.05   | 2.00  | 10.0   | 29.0   | 8.84   | 9.78   | 28.8   | 9.09   |
| Ni           | 0.2105 | 19.2   | 20.0  | 125    | 119    | 13.7   | 13.0  | 2.52   | 5.20  | 16.2   | 77.8   | 10.8   | 15.7   | 77.8   | 10.3   |
| Cu           | 0.0158 | 48.0   | 53.0  | 132    | 127    | 21.0   | 19.7  | 9.36   | 9.60  | 9.91   | 32.8   | 7.81   | 9.90   | 32.7   | 8.07   |
| Zn           | 0.0380 | 84.3   | 86.0  | 108    | 103    | 132    | 133   | 30.3   | 32.0  | 44.7   | 71.6   | 41.4   | 43.8   | 69.9   | 41.4   |
| Ga           | 0.0018 | 20.6   | 20.0  | 21.8   | 21.7   | 22.3   | 23.0  | 16.6   | 16.5  | 16.9   | 19.3   | 16.7   | 16.6   | 19.4   | 16.4   |
| Rb           | 0.0212 | 67.2   | 66.3  | 9.09   | 9.11   | 47.3   | 46.9  | 149    | 150   | 126    | 81.2   | 117    | 125    | 80.6   | 115    |
| Sr           | 0.0872 | 653    | 661   | 400    | 396    | 345    | 340   | 108    | 108   | 317    | 917    | 307    | 317    | 889    | 303    |
| Y            | 0.0078 | 19.7   | 20.0  | 26.1   | 26.0   | 36.9   | 37.0  | 23.4   | 23.2  | 24.7   | 23.6   | 26.5   | 24.2   | 23.5   | 25.5   |
| Zr           | 0.0392 | 227    | 230   | 169    | 172    | 184    | 184   | 227    | 220   | 135    | 222    | 136    | 132    | 221    | 142    |
| Nb           | 0.0033 | 14.1   | 14.5  | 18.6   | 18.1   | 12.6   | 12.6  | 9.29   | 9.30  | 11.9   | 94.9   | 12.0   | 12.2   | 95.4   | 12.1   |
| Sn           | 0.0990 | 1.81   | 1.83  | 1.72   | 1.70   | 2.00   | 2.03  | 3.37   | 3.34  | 4.45   | 1.65   | 3.12   | 4.38   | 1.70   | 2.81   |
| Cs           | 0.0014 | 1.15   | 1.16  | 0.095  | 0.10   | 1.10   | 1.10  | 9.62   | 9.60  | 7.35   | 1.33   | 6.22   | 7.67   | 1.34   | 6.31   |
| Ba           | 0.1632 | 1116   | 1130  | 129    | 131    | 668    | 677   | 836    | 810   | 713    | 879    | 715    | 733    | 873    | 729    |
| La           | 0.0035 | 38.5   | 37.9  | 15.5   | 15.2   | 24.7   | 24.9  | 23.3   | 24.0  | 32.8   | 48.0   | 35.1   | 31.2   | 47.6   | 33.3   |
| Ce           | 0.0091 | 69.0   | 68.6  | 37.5   | 37.5   | 53.0   | 52.9  | 46.6   | 47.0  | 61.4   | 82.9   | 67.4   | 59.6   | 82.4   | 63.1   |
| Pr           | 0.0012 | 8.10   | 7.84  | 5.20   | 5.35   | 6.68   | 6.70  | 5.28   | 5.36  | 6.71   | 8.98   | 7.06   | 6.36   | 8.70   | 6.69   |
| Nd           | 0.0027 | 30.8   | 30.5  | 24.2   | 24.5   | 28.2   | 28.7  | 19.5   | 19.0  | 25.0   | 34.1   | 25.9   | 24.2   | 33.5   | 24.9   |
| Sm           | 0.0017 | 5.40   | 5.49  | 6.22   | 6.07   | 6.77   | 6.58  | 4.07   | 4.30  | 4.85   | 6.57   | 5.10   | 4.96   | 6.49   | 5.07   |
| Eu           | 0.0007 | 1.58   | 1.54  | 2.08   | 2.07   | 1.94   | 1.96  | 0.63   | 0.66  | 0.96   | 1.90   | 1.04   | 1.00   | 2.05   | 0.95   |
| Gd           | 0.0015 | 4.72   | 4.52  | 6.27   | 6.24   | 6.57   | 6.75  | 3.67   | 3.70  | 4.17   | 5.61   | 4.48   | 4.34   | 5.67   | 4.22   |
| Tb           | 0.0008 | 0.63   | 0.64  | 0.95   | 0.92   | 1.12   | 1.07  | 0.60   | 0.66  | 0.69   | 0.81   | 0.69   | 0.70   | 0.83   | 0.68   |
| Dy           | 0.0011 | 3.63   | 3.47  | 5.41   | 5.31   | 6.47   | 6.41  | 3.81   | 4.10  | 4.17   | 4.60   | 4.48   | 4.07   | 4.54   | 4.36   |
| Ho           | 0.0007 | 0.67   | 0.65  | 0.99   | 0.98   | 1.32   | 1.28  | 0.76   | 0.82  | 0.88   | 0.84   | 0.93   | 0.87   | 0.91   | 0.94   |
| Er           | 0.0004 | 1.91   | 1.81  | 2.51   | 2.54   | 3.60   | 3.66  | 2.34   | 2.35  | 2.42   | 2.35   | 2.59   | 2.37   | 2.32   | 2.52   |
| Tm           | 0.0007 | 0.26   | 0.26  | 0.33   | 0.33   | 0.54   | 0.54  | 0.37   | 0.37  | 0.37   | 0.33   | 0.38   | 0.37   | 0.32   | 0.41   |

|    |        |      |      |       |       |      |      |      |      |      |       |      |      |       |      |
|----|--------|------|------|-------|-------|------|------|------|------|------|-------|------|------|-------|------|
| Yb | 0.0011 | 1.69 | 1.62 | 2.07  | 2.00  | 3.38 | 3.38 | 2.48 | 2.60 | 2.35 | 2.05  | 2.52 | 2.36 | 2.13  | 2.53 |
| Lu | 0.0002 | 0.25 | 0.25 | 0.29  | 0.27  | 0.51 | 0.50 | 0.38 | 0.40 | 0.36 | 0.30  | 0.40 | 0.36 | 0.31  | 0.39 |
| Hf | 0.0023 | 5.06 | 5.00 | 4.49  | 4.36  | 4.87 | 4.90 | 6.05 | 6.20 | 3.95 | 4.42  | 3.96 | 3.80 | 4.52  | 3.99 |
| Ta | 0.0008 | 0.84 | 0.87 | 1.14  | 1.14  | 0.79 | 0.78 | 0.97 | 0.95 | 1.22 | 5.13  | 1.28 | 1.31 | 5.09  | 1.28 |
| Tl | 0.0008 | 0.31 | 0.27 | 0.021 | 0.058 | 0.30 |      | 1.00 | 0.93 | 0.84 | 0.090 | 0.78 | 0.93 | 0.098 | 0.87 |
| Pb | 0.0032 | 13.7 | 13.2 | 1.60  | 1.60  | 10.0 | 11.0 | 19.9 | 19.3 | 37.5 | 5.93  | 31.1 | 37.5 | 6.11  | 31.2 |
| Th | 0.0040 | 6.27 | 6.10 | 1.22  | 1.22  | 5.88 | 5.70 | 14.8 | 15.1 | 15.1 | 7.65  | 15.5 | 14.5 | 7.70  | 15.2 |
| U  | 0.0010 | 1.94 | 1.86 | 0.39  | 0.40  | 1.66 | 1.69 | 5.77 | 5.80 | 4.63 | 2.30  | 4.51 | 4.66 | 2.23  | 4.49 |

Analyzed international standard materials include AGV-2, BHVO-2, BCR-2 and RGM2. The recommended value of the standard materials is from [http://minerals.cr.usgs.gov/geo\\_chem\\_stand/](http://minerals.cr.usgs.gov/geo_chem_stand/), <http://georem.mpch-mainz.gwdg.de/> and Govindaraju G.(1994). D\*=duplicate. References: Govindaraju G. Compilation of working values and sample description for 383 geostandards. Geostandards Newslett. 1994,18: 1-158. Liu YS, Zong KQ, Kelemen PB and Gao S, 2008. Geochemistry and magmatic history of eclogites and ultramafic rocks from the Chinese continental scientific drill hole: subduction and ultrahigh-pressure metamorphism of lower crustal cumulates. Chemical Geology, 247: 133-153.

Table S4. Whole rock Sr-Nd compositions and calculations of basalts and dacites

| Sample no. | Rock type | Rb   | Sr   | T(Ma) | $^{87}\text{Rb}/^{86}\text{Sr}$ | $^{87}\text{Sr}/^{86}\text{Sr}$ | $\pm 2\sigma$ | $(^{87}\text{Sr}/^{86}\text{Sr})_i$ | Sm   | Nd   | $^{147}\text{Sm}/^{144}\text{Nd}$ | $^{143}\text{Nd}/^{144}\text{Nd}$ | $\pm 2\sigma$ | $\varepsilon_{\text{Nd}}(t)$ | $(^{143}\text{Nd}/^{144}\text{Nd})_i$ |
|------------|-----------|------|------|-------|---------------------------------|---------------------------------|---------------|-------------------------------------|------|------|-----------------------------------|-----------------------------------|---------------|------------------------------|---------------------------------------|
| 831DH      | Basalt    | 82.7 | 929  | 0.236 | 0.258                           | 0.703099                        | 0.000011      | 0.70310                             | 6.27 | 32.5 | 0.117                             | 0.512971                          | 0.000005      | 6.5                          | 0.512971                              |
| 843DH      | Basalt    | 64.6 | 1529 | 0.236 | 0.122                           | 0.703434                        | 0.000009      | 0.70343                             | 10.9 | 62.3 | 0.106                             | 0.512855                          | 0.000004      | 4.2                          | 0.512855                              |
| 844DH      | Basalt    | 77.1 | 919  | 0.236 | 0.243                           | 0.703097                        | 0.000008      | 0.70310                             | 6.82 | 33.9 | 0.122                             | 0.512965                          | 0.000004      | 6.4                          | 0.512965                              |
| 912DH      | Basalt    | 79.0 | 923  | 0.236 | 0.248                           | 0.703203                        | 0.000009      | 0.70320                             | 6.66 | 33.8 | 0.120                             | 0.512967                          | 0.000006      | 6.4                          | 0.512967                              |
| 914DH      | Basalt    | 81.2 | 917  | 0.236 | 0.257                           | 0.703186                        | 0.000008      | 0.70319                             | 6.57 | 34.1 | 0.117                             | 0.512948                          | 0.000004      | 6.0                          | 0.512948                              |
| 916DH      | Basalt    | 79.9 | 966  | 0.236 | 0.240                           | 0.703119                        | 0.000011      | 0.70312                             | 6.84 | 35.8 | 0.116                             | 0.512958                          | 0.000005      | 6.2                          | 0.512958                              |
| 918DH      | Basalt    | 87.3 | 1000 | 0.236 | 0.253                           | 0.703163                        | 0.000011      | 0.70316                             | 8.07 | 41.8 | 0.117                             | 0.512949                          | 0.000003      | 6.1                          | 0.512949                              |
| 932DH      | Basalt    | 76.2 | 999  | 0.236 | 0.221                           | 0.703067                        | 0.000008      | 0.70307                             | 7.32 | 39.0 | 0.114                             | 0.512971                          | 0.000004      | 6.5                          | 0.512971                              |
| 933DH      | Basalt    | 79.2 | 1010 | 0.236 | 0.227                           | 0.703085                        | 0.000007      | 0.70308                             | 7.64 | 39.1 | 0.118                             | 0.512967                          | 0.000004      | 6.4                          | 0.512967                              |
| 937DH      | Basalt    | 80.3 | 1008 | 0.236 | 0.231                           | 0.703091                        | 0.000011      | 0.70309                             | 7.25 | 38.6 | 0.114                             | 0.512958                          | 0.000004      | 6.2                          | 0.512958                              |
| 919DH      | Dacite    | 156  | 429  | 18    | 1.056                           | 0.710634                        | 0.000008      | 0.71036                             | 4.38 | 19.8 | 0.134                             | 0.512366                          | 0.000005      | -5.2                         | 0.512350                              |
| 920DH      | Dacite    | 120  | 691  | 18    | 0.502                           | 0.710951                        | 0.000007      | 0.71082                             | 4.39 | 19.2 | 0.139                             | 0.512408                          | 0.000008      | -4.4                         | 0.512392                              |
| 820DH      | Dacite    | 126  | 317  | 18    | 1.150                           | 0.710059                        | 0.000008      | 0.70977                             | 4.85 | 25.0 | 0.117                             | 0.512263                          | 0.000004      | -7.1                         | 0.512249                              |
| 821DH      | Dacite    | 125  | 311  | 18    | 1.163                           | 0.710015                        | 0.000007      | 0.70972                             | 4.92 | 26.2 | 0.114                             | 0.512268                          | 0.000004      | -7.0                         | 0.512255                              |
| 822DH      | Dacite    | 117  | 334  | 18    | 1.014                           | 0.710257                        | 0.000007      | 0.71000                             | 4.95 | 26.7 | 0.112                             | 0.512254                          | 0.000004      | -7.3                         | 0.512241                              |
| 824DH      | Dacite    | 118  | 293  | 18    | 1.166                           | 0.710298                        | 0.000009      | 0.71000                             | 5.34 | 28.7 | 0.113                             | 0.512266                          | 0.000005      | -7.1                         | 0.512253                              |
| 922DH      | Dacite    | 138  | 216  | 18    | 1.850                           | 0.710580                        | 0.000009      | 0.71011                             | 5.63 | 29.5 | 0.116                             | 0.512255                          | 0.000004      | -7.3                         | 0.512241                              |
| 924DH      | Dacite    | 113  | 290  | 18    | 1.128                           | 0.710329                        | 0.000008      | 0.71004                             | 4.83 | 23.0 | 0.127                             | 0.512263                          | 0.000005      | -7.2                         | 0.512248                              |
| 927DH      | Dacite    | 117  | 307  | 18    | 1.108                           | 0.710319                        | 0.000009      | 0.71004                             | 5.10 | 25.9 | 0.120                             | 0.512259                          | 0.000005      | -7.2                         | 0.512245                              |
| 928DH      | Dacite    | 114  | 268  | 18    | 1.229                           | 0.710325                        | 0.000007      | 0.71001                             | 4.67 | 23.3 | 0.122                             | 0.512270                          | 0.000005      | -7.0                         | 0.512256                              |
| 929DH      | Dacite    | 118  | 285  | 18    | 1.203                           | 0.710293                        | 0.000008      | 0.70999                             | 4.67 | 21.9 | 0.130                             | 0.512264                          | 0.000005      | -7.1                         | 0.512249                              |
| 930DH      | Dacite    | 134  | 220  | 18    | 1.760                           | 0.710547                        | 0.000009      | 0.71010                             | 4.89 | 24.1 | 0.123                             | 0.512257                          | 0.000004      | -7.3                         | 0.512242                              |
| Standard   |           |      |      |       |                                 |                                 |               | Recommended value                   |      |      |                                   |                                   |               | Recommended value            |                                       |

|       |          |          |                       |          |          |                       |                       |
|-------|----------|----------|-----------------------|----------|----------|-----------------------|-----------------------|
| BCR-2 | 0.704997 | 0.000008 | 0.705026 <sup>1</sup> | 0.512648 | 0.000005 | 0.512638 <sup>1</sup> | 0.000015 <sup>1</sup> |
| RGM-2 | 0.704146 | 0.000011 | 0.704184 <sup>1</sup> | 0.512816 | 0.000004 | 0.512803 <sup>2</sup> |                       |

1. Weis, D., Kieffer, B., Maerschalk, C., Barling, J., Jong, J. D., Williams, G. A., et al. (2006). High-precision isotopic characterization of usgs reference materials by tims and mc-icp-ms. *Geochemistry Geophysics Geosystems*, 7(8), 139-149.
2. Li, C. F., Li, X. H., Li, Q. L., Guo, J. H., & Yang, Y. H. (2012). Rapid and precise determination of sr and nd isotopic ratios in geological samples from the same filament loading by thermal ionization mass spectrometry employing a single-step separation scheme. *Analytica Chimica Acta*, 727(10), 54-60.
