# Supplementary material
Source: publisher figshare collection journal article supplement (https://gsapubs.figshare.com/articles/dataset/_/22561255)
Supplement: Supplementary file 1 [file 5]

## Sheet: Table S5A-spinel peridotite
Table S5A. Modeling calculation of Ca isotope fractionation during partial melting of spinel peridotite
αopx-cpx=1.00026
	Ol	Cpx	Opx	Sp	Sum	Bulk rock CaO	δ44/40Ca0	Melt increment F0	αmelt-cpx	αol-cpx	αcpx-cpx	αopx-cpx	αSp-cpx
Initial modal abundance	0.51	0.14	0.33	0.02	1	0.035485	0.94	0.02	1	1.00024	1	1.00026	1
Melting mode	-0.167	0.466	0.652	0.049	1
DMNR/MELT from Adam and Green (2006)	0.02	2.35	0.19	0.01
Initial CaO content	0.0015	0.215	0.014	0
	F	f	Residue modal abundance				Normalised to 1					D	P	Melt CaO content	Residue mineral CaO content				αmelt-residue	Δmelt-residue	Residue CaO content	δ44/40Caresidue	δ44/40Cainst.melt	δ44/40Caaggr.melt
			Ol	Cpx	Opx	Sp	Ol	Cpx	Opx	Sp	Sum				Ol	Cpx	Opx	Sp
1	0.02	0.02	0.51334	0.13068	0.31696	0.01902	0.523816	0.133347	0.323429	0.0194082	1	0.4021	1.21613	0.0892082	0.00178416	0.209639	0.0169496	0.000892082	0.999952	-0.0479685	0.0343886	0.942412	0.894443	0.894443
2	0.04	0.0204082	0.527224	0.123837	0.310122	0.0184082	0.538208	0.126417	0.316583	0.0187917	1	0.385487	1.21613	0.0864711	0.00172942	0.203207	0.0164295	0.000864711	0.999951	-0.0494923	0.0333036	0.944952	0.895459	0.894943
3	0.06	0.0208333	0.541687	0.116708	0.303	0.0177708	0.553213	0.119191	0.309447	0.0181489	1	0.368182	1.21613	0.0874145	0.00174829	0.205424	0.0166088	0.000874145	0.999949	-0.0512412	0.0321523	0.947754	0.896512	0.895465
4	0.08	0.0212766	0.556766	0.109277	0.295574	0.0171064	0.56887	0.111652	0.302	0.0174783	1	0.350141	1.21613	0.0884316	0.00176863	0.207814	0.016802	0.000884316	0.999947	-0.0532693	0.0309288	0.950871	0.897602	0.896002
5	0.1	0.0217391	0.5725	0.101522	0.287826	0.016413	0.585222	0.103778	0.294222	0.0167778	1	0.331315	1.21613	0.0895339	0.00179068	0.210405	0.0170114	0.000895339	0.999944	-0.0556491	0.0296265	0.954373	0.898724	0.896555
6	0.12	0.0222222	0.588933	0.0934222	0.279733	0.0156889	0.602318	0.0955455	0.286091	0.0160455	1	0.311652	1.21613	0.0907362	0.00181472	0.21323	0.0172399	0.000907362	0.999942	-0.0584808	0.0282376	0.958353	0.899872	0.897121
7	0.14	0.0227273	0.606114	0.0849545	0.271273	0.0149318	0.620209	0.0869302	0.277581	0.0152791	1	0.291096	1.21613	0.0920571	0.00184114	0.216334	0.0174908	0.000920571	0.999938	-0.0619066	0.0267534	0.96294	0.901033	0.897698
8	0.16	0.0232558	0.624093	0.076093	0.262419	0.0141395	0.638952	0.0779048	0.268667	0.0144762	1	0.269583	1.21613	0.0935207	0.00187041	0.219774	0.0177689	0.000935207	0.999934	-0.0661355	0.0251637	0.968316	0.902181	0.898283
9	0.18	0.0238095	0.642929	0.0668095	0.253143	0.0133095	0.65861	0.068439	0.259317	0.0136341	1	0.247047	1.21613	0.0951595	0.00190319	0.223625	0.0180803	0.000951595	0.999929	-0.0714873	0.0234565	0.974753	0.903266	0.898866
10	0.2	0.0243902	0.662683	0.0570732	0.243415	0.012439	0.67925	0.0585	0.2495	0.01275	1	0.22341	1.21613	0.0970179	0.00194036	0.227992	0.0184334	0.000970179	0.999922	-0.0784777	0.0216175	0.98267	0.904192	0.899434
11	0.22	0.025	0.683425	0.04685	0.2332	0.011525	0.700949	0.0480513	0.239179	0.0118205	1	0.198593	1.21613	0.0991595	0.00198319	0.233025	0.0188403	0.000991595	0.999912	-0.0879953	0.0196292	0.992761	0.904765	0.899958
12	0.24	0.025641	0.705231	0.0361026	0.222462	0.0105641	0.723789	0.0370526	0.228316	0.0108421	1	0.172502	1.21613	0.101679	0.00203358	0.238946	0.019319	0.00101679	0.999898	-0.101713	0.01747	1.00627	0.904557	0.900379
13	0.26	0.0263158	0.728184	0.0247895	0.211158	0.00955263	0.747865	0.0254595	0.216865	0.00981081	1	0.145038	1.21613	0.104727	0.00209455	0.246109	0.0198982	0.00104727	0.999877	-0.123198	0.0151117	1.02571	0.902507	0.900563
14	0.28	0.027027	0.752378	0.0128649	0.199243	0.00848649	0.773278	0.0132222	0.204778	0.00872222	1	0.116089	1.21613	0.108564	0.00217128	0.255125	0.0206271	0.00108564	0.999838	-0.161653	0.0125158	1.05709	0.89544	0.900143
15	0.3	0.0277778	0.777917	0.000277778	0.186667	0.00736111	0.800143	0.000285714	0.192	0.00757143	1	0.0855328	1.21613	0.113691	0.00227383	0.267175	0.0216014	0.00113691	0.99975	-0.250307	0.00962509	1.12025	0.869946	0.897754
αopx-cpx=1.00050
	Ol	Cpx	Opx	Sp	Sum	Bulk rock CaO	δ44/40Ca0	Melt increment F0	αmelt-cpx	αol-cpx	αcpx-cpx	αopx-cpx	αSp-cpx
Initial modal abundance	0.51	0.14	0.33	0.02	1	0.035485	0.94	0.02	1	1.00024	1	1.0005	1
Melting mode	-0.167	0.466	0.652	0.049	1
DMNR/MELT from Adam and Green (2006)	0.02	2.35	0.19	0.01
Initial CaO content	0.0015	0.215	0.014	0
	F	f	Residue modal abundance				Normalised to 1					D	P	Melt CaO content	Residue mineral CaO content				αmelt-residue	Δmelt-residue	Residue CaO content	δ44/40Caresidue	δ44/40Cainst.melt	δ44/40Caaggr.melt
			Ol	Cpx	Opx	Sp	Ol	Cpx	Opx	Sp	Sum				Ol	Cpx	Opx	Sp
1	0.02	0.02	0.51334	0.13068	0.31696	0.01902	0.523816	0.133347	0.323429	0.0194082	1	0.4021	1.21613	0.0892082	0.00178416	0.209639	0.0169496	0.000892082	0.999914	-0.0862249	0.0343886	0.944335	0.85811	0.85811
2	0.04	0.0204082	0.527224	0.123837	0.310122	0.0184082	0.538208	0.126417	0.316583	0.0187917	1	0.385487	1.21613	0.0864711	0.00172942	0.203207	0.0164295	0.000864711	0.999911	-0.088699	0.0333036	0.948887	0.860188	0.859133
3	0.06	0.0208333	0.541687	0.116708	0.303	0.0177708	0.553213	0.119191	0.309447	0.0181489	1	0.368182	1.21613	0.0874145	0.00174829	0.205424	0.0166088	0.000874145	0.999908	-0.0915386	0.0321523	0.953893	0.862354	0.860203
4	0.08	0.0212766	0.556766	0.109277	0.295574	0.0171064	0.56887	0.111652	0.302	0.0174783	1	0.350141	1.21613	0.0884316	0.00176863	0.207814	0.016802	0.000884316	0.999905	-0.0948315	0.0309288	0.959442	0.864611	0.861312
5	0.1	0.0217391	0.5725	0.101522	0.287826	0.016413	0.585222	0.103778	0.294222	0.0167778	1	0.331315	1.21613	0.0895339	0.00179068	0.210405	0.0170114	0.000895339	0.999901	-0.0986955	0.0296265	0.965653	0.866958	0.862458
6	0.12	0.0222222	0.588933	0.0934222	0.279733	0.0156889	0.602318	0.0955455	0.286091	0.0160455	1	0.311652	1.21613	0.0907362	0.00181472	0.21323	0.0172399	0.000907362	0.999897	-0.103293	0.0282376	0.972683	0.86939	0.863641
7	0.14	0.0227273	0.606114	0.0849545	0.271273	0.0149318	0.620209	0.0869302	0.277581	0.0152791	1	0.291096	1.21613	0.0920571	0.00184114	0.216334	0.0174908	0.000920571	0.999891	-0.108855	0.0267534	0.980749	0.871893	0.864859
8	0.16	0.0232558	0.624093	0.076093	0.262419	0.0141395	0.638952	0.0779048	0.268667	0.0144762	1	0.269583	1.21613	0.0935207	0.00187041	0.219774	0.0177689	0.000935207	0.999884	-0.115722	0.0251637	0.990156	0.874435	0.866107
9	0.18	0.0238095	0.642929	0.0668095	0.253143	0.0133095	0.65861	0.068439	0.259317	0.0136341	1	0.247047	1.21613	0.0951595	0.00190319	0.223625	0.0180803	0.000951595	0.999876	-0.124411	0.0234565	1.00136	0.876947	0.867376
10	0.2	0.0243902	0.662683	0.0570732	0.243415	0.012439	0.67925	0.0585	0.2495	0.01275	1	0.22341	1.21613	0.0970179	0.00194036	0.227992	0.0184334	0.000970179	0.999864	-0.135761	0.0216175	1.01505	0.879293	0.868648
11	0.22	0.025	0.683425	0.04685	0.2332	0.011525	0.700949	0.0480513	0.239179	0.0118205	1	0.198593	1.21613	0.0991595	0.00198319	0.233025	0.0188403	0.000991595	0.999849	-0.151214	0.0196292	1.03239	0.88118	0.86988
12	0.24	0.025641	0.705231	0.0361026	0.222462	0.0105641	0.723789	0.0370526	0.228316	0.0108421	1	0.172502	1.21613	0.101679	0.00203358	0.238946	0.019319	0.00101679	0.999827	-0.173486	0.01747	1.05544	0.881951	0.870985
13	0.26	0.0263158	0.728184	0.0247895	0.211158	0.00955263	0.747865	0.0254595	0.216865	0.00981081	1	0.145038	1.21613	0.104727	0.00209455	0.246109	0.0198982	0.00104727	0.999792	-0.208369	0.0151117	1.08831	0.879939	0.871757
14	0.28	0.027027	0.752378	0.0128649	0.199243	0.00848649	0.773278	0.0132222	0.204778	0.00872222	1	0.116089	1.21613	0.108564	0.00217128	0.255125	0.0206271	0.00108564	0.999729	-0.270802	0.0125158	1.14089	0.870085	0.87162
15	0.3	0.0277778	0.777917	0.000277778	0.186667	0.00736111	0.800143	0.000285714	0.192	0.00757143	1	0.0855328	1.21613	0.113691	0.00227383	0.267175	0.0216014	0.00113691	0.999585	-0.414731	0.00962509	1.24554	0.830805	0.868391
Note: Ol-olivine; Cpx-clinopyroxene; Opx-orthopyroxene; Sp-spinel; F-melting degree

## Sheet: Table S5B-grt peridotite
Table S5B. Modeling calculation of Ca isotope fractionation during partial melting of garnet peridotite
αopx-cpx=1.00026
	Ol	Cpx	Opx	Grt	Sum	Bulk rock CaO	δ44/40Ca0	Melt increment F0	αmelt-cpx	αol-cpx	αcpx-cpx	αopx-cpx	αgrt-cpx
Initial modal abundance	0.61	0.226	0.077	0.089	1.002	0.037865	0.94	0.02	1	1.00024	1	1.00026	1.00034
Melting mode	0.08	0.8	-0.18	0.3	1
DMNR/MELT from Davis et al. (2011)	0.02	2.35	0.19	0.87
Initial CaO content	0.002	0.13	0.025	0.06
	F	f	Residue modal abundance				Normalised to 1					D	P	Melt CaO content	Residue mineral CaO content				αmelt-residue	Δmelt-residue	Residue CaO content	δ44/40Caresidue	δ44/40Cainst.melt	δ44/40Caaggr.melt
			Ol	Cpx	Opx	Grt	Ol	Cpx	Opx	Grt	Sum				Ol	Cpx	Opx	Grt
1	0.02	0.02	0.6084	0.21	0.0806	0.083	0.619552	0.213849	0.0820774	0.0845214	1	0.63536	2.1084	0.0617506	0.00123501	0.145114	0.0117326	0.0537231	0.999947	-0.0530225	0.0373775	0.941729	0.888707	0.888707
2	0.04	0.0204082	0.617919	0.197523	0.0857509	0.0783989	0.630793	0.201638	0.0875373	0.0800322	1	0.604065	2.1084	0.0610007	0.00122001	0.143352	0.0115901	0.0530706	0.999946	-0.0541706	0.0368854	0.943534	0.889363	0.889033
3	0.06	0.0208333	0.629126	0.184971	0.0912873	0.0737822	0.642512	0.188907	0.0932296	0.0753521	1	0.572725	2.1084	0.0634889	0.00126978	0.149199	0.0120629	0.0552354	0.999944	-0.0555094	0.0363194	0.945524	0.890015	0.889368
4	0.08	0.0212766	0.640809	0.171885	0.0970594	0.0689691	0.65474	0.175622	0.0991694	0.0704684	1	0.540051	2.1084	0.0661384	0.00132277	0.155425	0.0125663	0.0575404	0.999943	-0.0570908	0.0356711	0.947736	0.890645	0.889702
5	0.1	0.0217391	0.653001	0.158231	0.103082	0.0639467	0.667512	0.161747	0.105373	0.0653677	1	0.505956	2.1084	0.0691361	0.00138272	0.16247	0.0131359	0.0601484	0.999941	-0.0589873	0.0349275	0.950222	0.891234	0.890032
6	0.12	0.0222222	0.665734	0.143969	0.109373	0.0587011	0.680865	0.147241	0.111859	0.0600352	1	0.470347	2.1084	0.0725652	0.0014513	0.170528	0.0137874	0.0631317	0.999939	-0.0613033	0.034072	0.953052	0.891748	0.890348
7	0.14	0.0227273	0.679046	0.129059	0.11595	0.053217	0.694838	0.132061	0.118646	0.0544546	1	0.433118	2.1084	0.0765396	0.00153079	0.179868	0.0145425	0.0665895	0.999936	-0.0641956	0.0330844	0.956329	0.892134	0.890638
8	0.16	0.0232558	0.692978	0.113456	0.122832	0.0474779	0.709477	0.116158	0.125757	0.0486083	1	0.394158	2.1084	0.0812204	0.00162441	0.190868	0.0154319	0.0706618	0.999932	-0.0679097	0.0319383	0.960206	0.892297	0.890882
9	0.18	0.0238095	0.707572	0.0971099	0.130043	0.0414654	0.72483	0.0994784	0.133214	0.0424768	1	0.353343	2.1084	0.0868438	0.00173688	0.204083	0.0165003	0.0755541	0.999927	-0.0728539	0.0305992	0.964923	0.892069	0.891044
10	0.2	0.0243902	0.722879	0.0799662	0.137605	0.0351597	0.740951	0.0819654	0.141045	0.0360387	1	0.310536	2.1084	0.0937737	0.00187547	0.220368	0.017817	0.0815832	0.99992	-0.0797605	0.0290198	0.970885	0.891124	0.891054
11	0.22	0.025	0.738951	0.0619654	0.145545	0.0285387	0.757899	0.0635542	0.149277	0.0292705	1	0.26559	2.1084	0.102606	0.00205213	0.241125	0.0194952	0.0892676	0.99991	-0.0900873	0.027133	0.978848	0.888761	0.890772
12	0.24	0.025641	0.755847	0.0430414	0.153892	0.0215782	0.775738	0.0441741	0.157942	0.022146	1	0.218338	2.1084	0.114403	0.00228807	0.268848	0.0217366	0.099531	0.999893	-0.107211	0.0248364	0.990439	0.883228	0.889863
13	0.26	0.0263158	0.773633	0.0231214	0.162679	0.0142513	0.794542	0.0237464	0.167075	0.0146364	1	0.1686	2.1084	0.131291	0.00262583	0.308535	0.0249454	0.114224	0.999859	-0.141131	0.0219592	1.01007	0.86894	0.887322
14	0.28	0.027027	0.79238	0.00212473	0.17194	0.00652832	0.81439	0.00218375	0.176716	0.00670966	1	0.116173	2.1084	0.158387	0.00316773	0.372209	0.0300935	0.137796	0.99976	-0.24036	0.0181696	1.05693	0.816568	0.878278
15	0.3	0.0277778	0.812168	0	0.181716	0	0.817165	0	0.182835	0	1	0.0608332	2.1084	0.212799	0.00425597	0.500077	0.0404317	0.185135	0.999746	-0.253569	0.0126087	1.13942	0.885851	0.879388
αopx-cpx=1.00050
	Ol	Cpx	Opx	Grt	Sum	Bulk rock CaO	δ44/40Ca0	Melt increment F0	αmelt-cpx	αol-cpx	αcpx-cpx	αopx-cpx	αgrt-cpx
Initial modal abundance	0.61	0.226	0.077	0.089	1.002	0.037865	0.94	0.02	1	1.00024	1	1.0005	1.00034
Melting mode	0.08	0.8	-0.18	0.3	1
DMNR/MELT from Adam and Green (2006)	0.02	2.35	0.19	0.87
Initial CaO content	0.002	0.13	0.025	0.06
	F	f	Residue modal abundance				Normalised to 1					D	P	Melt CaO content	Residue mineral CaO content				αmelt-residue	Δmelt-residue	Residue CaO content	δ44/40Caresidue	δ44/40Cainst.melt	δ44/40Caaggr.melt
			Ol	Cpx	Opx	Grt	Ol	Cpx	Opx	Grt	Sum				Ol	Cpx	Opx	Grt
1	0.02	0.02	0.6084	0.21	0.0806	0.083	0.619552	0.213849	0.0820774	0.0845214	1	0.63536	2.1084	0.0617506	0.00123501	0.145114	0.0117326	0.0537231	0.999941	-0.0592181	0.0373775	0.941931	0.882713	0.882713
2	0.04	0.0204082	0.617919	0.197523	0.0857509	0.0783989	0.630793	0.201638	0.0875373	0.0800322	1	0.604065	2.1084	0.0610007	0.00122001	0.143352	0.0115901	0.0530706	0.999939	-0.0611399	0.0368854	0.943968	0.882828	0.88277
3	0.06	0.0208333	0.629126	0.184971	0.0912873	0.0737822	0.642512	0.188907	0.0932296	0.0753521	1	0.572725	2.1084	0.0634889	0.00126978	0.149199	0.0120629	0.0552354	0.999937	-0.0633809	0.0363194	0.946241	0.88286	0.882801
4	0.08	0.0212766	0.640809	0.171885	0.0970594	0.0689691	0.65474	0.175622	0.0991694	0.0704684	1	0.540051	2.1084	0.0661384	0.00132277	0.155425	0.0125663	0.0575404	0.999934	-0.066028	0.0356711	0.948799	0.882771	0.882793
5	0.1	0.0217391	0.653001	0.158231	0.103082	0.0639467	0.667512	0.161747	0.105373	0.0653677	1	0.505956	2.1084	0.0691361	0.00138272	0.16247	0.0131359	0.0601484	0.999931	-0.0692025	0.0349275	0.951715	0.882512	0.882733
6	0.12	0.0222222	0.665734	0.143969	0.109373	0.0587011	0.680865	0.147241	0.111859	0.0600352	1	0.470347	2.1084	0.0725652	0.0014513	0.170528	0.0137874	0.0631317	0.999927	-0.0730794	0.034072	0.955089	0.882009	0.882599
7	0.14	0.0227273	0.679046	0.129059	0.11595	0.053217	0.694838	0.132061	0.118646	0.0544546	1	0.433118	2.1084	0.0765396	0.00153079	0.179868	0.0145425	0.0665895	0.999922	-0.0779208	0.0330844	0.959067	0.881146	0.882363
8	0.16	0.0232558	0.692978	0.113456	0.122832	0.0474779	0.709477	0.116158	0.125757	0.0486083	1	0.394158	2.1084	0.0812204	0.00162441	0.190868	0.0154319	0.0706618	0.999916	-0.0841378	0.0319383	0.96387	0.879733	0.881976
9	0.18	0.0238095	0.707572	0.0971099	0.130043	0.0414654	0.72483	0.0994784	0.133214	0.0424768	1	0.353343	2.1084	0.0868438	0.00173688	0.204083	0.0165003	0.0755541	0.999908	-0.0924138	0.0305992	0.969853	0.87744	0.881359
10	0.2	0.0243902	0.722879	0.0799662	0.137605	0.0351597	0.740951	0.0819654	0.141045	0.0360387	1	0.310536	2.1084	0.0937737	0.00187547	0.220368	0.017817	0.0815832	0.999896	-0.103975	0.0290198	0.977625	0.87365	0.880372
11	0.22	0.025	0.738951	0.0619654	0.145545	0.0285387	0.757899	0.0635542	0.149277	0.0292705	1	0.26559	2.1084	0.102606	0.00205213	0.241125	0.0194952	0.0892676	0.999879	-0.12126	0.027133	0.988344	0.867083	0.878739
12	0.24	0.025641	0.755847	0.0430414	0.153892	0.0215782	0.775738	0.0441741	0.157942	0.022146	1	0.218338	2.1084	0.114403	0.00228807	0.268848	0.0217366	0.099531	0.99985	-0.149923	0.0248364	1.00455	0.85463	0.875834
13	0.26	0.0263158	0.773633	0.0231214	0.162679	0.0142513	0.794542	0.0237464	0.167075	0.0146364	1	0.1686	2.1084	0.131291	0.00262583	0.308535	0.0249454	0.114224	0.999793	-0.2067	0.0219592	1.03331	0.826606	0.869854
14	0.28	0.027027	0.79238	0.00212473	0.17194	0.00652832	0.81439	0.00218375	0.176716	0.00670966	1	0.116173	2.1084	0.158387	0.00316773	0.372209	0.0300935	0.137796	0.999627	-0.372784	0.0181696	1.10598	0.733193	0.852386
15	0.3	0.0277778	0.812168	0	0.181716	0	0.817165	0	0.182835	0	1	0.0608332	2.1084	0.212799	0.00425597	0.500077	0.0404317	0.185135	0.999583	-0.416728	0.0126087	1.24155	0.824822	0.848346
Note: Ol-olivine; Cpx-clinopyroxene; Opx-orthopyroxene; Sp-spinel; F-melting degree

## Sheet: Table S5C-Garnet Pyroxenite
Table S5C. Modeling calcium isotope fractionation during partial melting of garnet pyroxenite.
	Grt	Cpx	Sum	Bulk CaO (wt%)	δ44/40Ca0	Melt increment F0	αmelt-Cpx	αgrt-cpx	αcpx-cpx
Initial modal abundance	0.5	0.5	1	12.6	0.9	0.02	1	1.00034	1
Melting mode	0.2	0.8	1
DMNR/MELT from Pertermann et al. (2004)	1.002	1.78
Initial CaO content (wt%)	5.3	19.9
			Residue modal abundance		Normalised to 1					Residue CaO content			α					δ44/40Ca
	F	f	Grt	Cpx	Grt	Cpx	Sum	D	P	Melt	Grt	Cpx	Grt-Cpx	Cpx-Cpx	Melt-residue	Δmelt-residue	Residue CaO content	Inst.melt	Residue	Aggr.melt
1	0.02	0.02	0.496	0.484	0.506122	0.493878	1	1.391	1.6244	9.14029	9.15857	16.2697	1.00036	1	0.999868	-0.131716	12.6706	0.770195	0.901911	0.770195
2	0.04	0.0204082	0.502041	0.477551	0.5125	0.4875	1	1.38624	1.6244	9.19321	9.2116	16.3639	1.00036	1	0.999866	-0.133855	12.7431	0.770038	0.903893	0.770117
3	0.06	0.0208333	0.508333	0.470833	0.519149	0.480851	1	1.38128	1.6244	9.27963	9.29819	16.5177	1.00036	1	0.999864	-0.136101	12.8167	0.769857	0.905958	0.770029
4	0.08	0.0212766	0.514894	0.46383	0.526087	0.473913	1	1.3761	1.6244	9.36903	9.38777	16.6769	1.00036	1	0.999862	-0.138462	12.8917	0.769649	0.908111	0.769933
5	0.1	0.0217391	0.521739	0.456522	0.533333	0.466667	1	1.3707	1.6244	9.4616	9.48052	16.8416	1.00036	1	0.999859	-0.140949	12.9679	0.769411	0.91036	0.769827
6	0.12	0.0222222	0.528889	0.448889	0.540909	0.459091	1	1.36507	1.6244	9.55752	9.57663	17.0124	1.00036	1	0.999856	-0.143571	13.0454	0.769141	0.912712	0.76971
7	0.14	0.0227273	0.536364	0.440909	0.548837	0.451163	1	1.35917	1.6244	9.65701	9.67633	17.1895	1.00036	1	0.999854	-0.146339	13.1242	0.768834	0.915174	0.769581
8	0.16	0.0232558	0.544186	0.432558	0.557143	0.442857	1	1.353	1.6244	9.76032	9.77984	17.3734	1.00036	1	0.999851	-0.149267	13.2043	0.768489	0.917755	0.769439
9	0.18	0.0238095	0.552381	0.42381	0.565854	0.434146	1	1.34654	1.6244	9.86768	9.88742	17.5645	1.00036	1	0.999848	-0.152367	13.2857	0.768099	0.920466	0.769284
10	0.2	0.0243902	0.560976	0.414634	0.575	0.425	1	1.33977	1.6244	9.97939	9.99935	17.7633	1.00036	1	0.999844	-0.155656	13.3684	0.767662	0.923318	0.769114
11	0.22	0.025	0.57	0.405	0.584615	0.415385	1	1.33265	1.6244	10.0958	10.116	17.9705	1.00036	1	0.999841	-0.159152	13.4523	0.76717	0.926323	0.768928
12	0.24	0.025641	0.579487	0.394872	0.594737	0.405263	1	1.32517	1.6244	10.2171	10.2376	18.1865	1.00036	1	0.999837	-0.162875	13.5374	0.766619	0.929495	0.768724
13	0.26	0.0263158	0.589474	0.384211	0.605405	0.394595	1	1.31729	1.6244	10.3439	10.3646	18.4121	1.00036	1	0.999833	-0.166848	13.6237	0.766002	0.93285	0.7685
14	0.28	0.027027	0.6	0.372973	0.616667	0.383333	1	1.30899	1.6244	10.4764	10.4974	18.648	1.00036	1	0.999829	-0.171096	13.7111	0.765309	0.936406	0.768255
15	0.3	0.0277778	0.611111	0.361111	0.628571	0.371429	1	1.30023	1.6244	10.6152	10.6364	18.8951	1.00036	1	0.999824	-0.17565	13.7996	0.764533	0.940183	0.767987
